# Supplementary material for: Health service utilization after terrorism: a longitudinal study of survivors of the 2011 Utøya attack in Norway
Source: Springer Nature journal article supplement (doi:10.1186/s12913-015-0811-6), 2015-04-14
Supplement: MOESM1 [file 9757206]

Terrorangrepet 22. juli 2011.

*Opplevelser og reaksjoner hos de som var på Utøya*

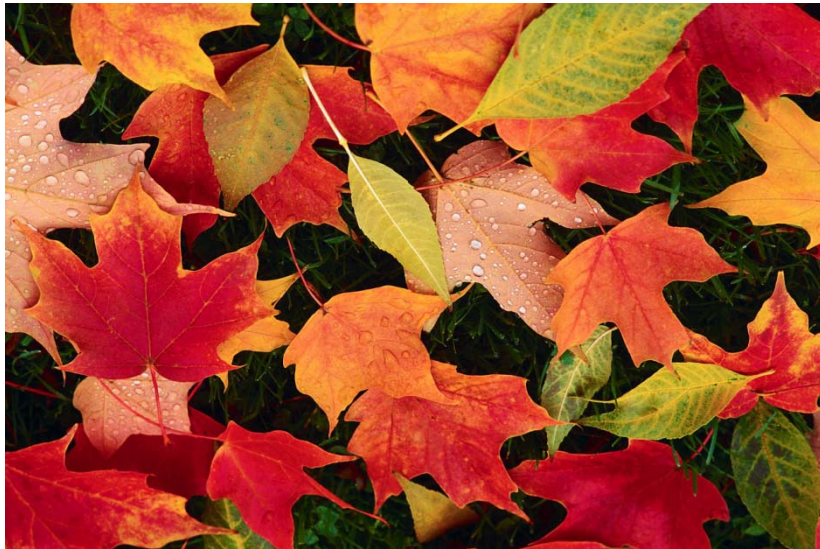

Nasjonalt kunnskapssenter  
om vold og traumatisk stress

# Instruks til intervjuer

*Først skal SAMTYKKE ERKLÆRINGEN underskrives av informanten. Ha alltid den med til intervjuene sammen med et eksemplar av informasjonsskrivet. Informasjonsskrivet som er sendt ut beskriver studien og gjennomføringen av denne. Informantene kan trekke seg også underveis i intervjuet.*

*Fyll ut arket med INFORMASJON OM INTERVJUET OG KONTAKTINFORMASJON før du leser introduksjonen og slår på diktafonen.*

*STILL ALLE SPØRSMÅL – ikke hopp over spørsmål du synes at de allerede har besvart. Temaer kan være overlappende, men spørsmålene skal likevel stilles. Dersom informanten ikke forstår spørsmålet: gjenta først spørsmålet langsommere. Deretter kan du forklare ORD i spørsmålet, og hva de betyr. Prøv å unngå og utdype spørsmålet med egen fortolkning.*

## Introduksjon

*(Les denne introduksjonen sammen med ungdommen før du starter intervjuet)*

Vi kommer til å snakke med mange ungdommer som overlevde terroren på Utøya og foreldrene deres. Grunnen til det er at det er viktig at vi lærer mer om hvilke konsekvenser slike handlinger kan ha, og hva som kan bidra til å minske belastningene etter slike opplevelser.

Jeg er opptatt av å høre hvordan det var for deg.

Det du forteller meg blir ikke fortalt videre til foreldrene dine, på samme måte som du ikke får vite fra oss hva foreldrene dine forteller. Hvis du sier noe som gjør at jeg blir bekymret for deg må vi drøfte hva vi kan gjøre for å hjelpe deg videre. Dersom du er under 18 år kan det hende jeg må snakke med foreldrene dine om dette, men da vil jeg si ifra til deg først.

Si ifra til meg hvis det er noe du ikke forstår, eller hvis det er noe du synes det er vanskelig å svare på. Hvis du vil ha en pause så er det helt i orden. Dersom det er spørsmål du ikke ønsker å svare på, sier du fra om det underveis. Du trenger ikke å forklare hvorfor du ikke ønsker å svare på spørsmål.

Først spør jeg deg om din historie fra hendelsen. Etter det vil jeg stille en del spørsmål med faste svaralternativ. Til slutt oppsummerer vi sammen.

Jeg har med en diktafon for at vi etter intervjuet kan skrive ned det du forteller. Er det i orden for deg?

**(Sett på diktafonen)**

|  |              |                |
|--|--------------|----------------|
|  | Prosjekt     | <b>1049371</b> |
|  | Skjemanummer |                |

|             |                                                                                              |
|-------------|----------------------------------------------------------------------------------------------|
| <b>ID</b>   | <b>NB! Skriv inn skjemanummer (id.nr.) og les det høyt opp på begynnelsen av intervjuet.</b> |
| Id-nr. .... | <input type="text"/>                                                                         |

## **Narrativ**

### ***Kronologisk historie***

**Jeg vet at du var på Utøya under terrorangrepet. Fortell meg om det...**

*Dersom informanten ikke svarer på det kan man si: Fortell meg om hvor du var da gjerningsmannen kom til Utøya?*

*La informanten fortelle mest mulig fritt.*

*Hjelp informanten videre ved å si: Hva skjedde da?*

*Hjelp informanten til å utdype ved å si: Fortell meg om det. Eller gjenta det siste de sa.*

### ***Det verste***

**Nå har du fortalt meg hva som skjedde.**

**Av alt det som skjedde, hva synes du var det verste som du opplevde?**

### ***Beslutningsprosesser***

**Da det skjedde, tenkte du eller sa du noe til deg selv for at du skulle føle deg bedre? Fortell**

**Når du tenker tilbake på alt det som skjedde, tenker du noen gang at du skulle gjort noe annerledes?**

Q1

**Hva opplevde du?**

Instruksjon, les opp:

**Nå har du fortalt meg om dine opplevelser fra Utøya 22. juli. Nå stiller jeg deg noen detaljerte spørsmål om hva du opplevde. På disse spørsmålene trenger du bare å svare Ja eller Nei.**

|                                                                                                 | Ja<br>1                  | Nei<br>2                 |    |
|-------------------------------------------------------------------------------------------------|--------------------------|--------------------------|----|
| • Fikk du vite om bombingene i Oslo før skytingen på Utøya? .....                               | <input type="checkbox"/> | <input type="checkbox"/> | 1  |
| • Var du bekymret for noen i familien eller en venn pga bombingene i Oslo? .....                | <input type="checkbox"/> | <input type="checkbox"/> | 2  |
| • Var du på Utøya da gjerningsmannen skjøt? .....                                               | <input type="checkbox"/> | <input type="checkbox"/> | 3  |
| • Så du gjerningsmannen eller hørte du stemmen hans? .....                                      | <input type="checkbox"/> | <input type="checkbox"/> | 4  |
| • Flyktet du fra gjerningsmannen (prøvde å gjemme deg eller løpe unna)? .....                   | <input type="checkbox"/> | <input type="checkbox"/> | 5  |
| • Hørte du skudd? .....                                                                         | <input type="checkbox"/> | <input type="checkbox"/> | 6  |
| • Hørte du skrik? .....                                                                         | <input type="checkbox"/> | <input type="checkbox"/> | 7  |
| • Kjønte du lukt fra skytingen eller ble du oppmerksom på annen lukt? .....                     | <input type="checkbox"/> | <input type="checkbox"/> | 8  |
| • Var du redd for at du kom til å bli alvorlig skadet? .....                                    | <input type="checkbox"/> | <input type="checkbox"/> | 9  |
| • Ble du fysisk skadet og hadde behov for medisinsk hjelp? .....                                | <input type="checkbox"/> | <input type="checkbox"/> | 10 |
| • Var du redd for at du kom til å dø? .....                                                     | <input type="checkbox"/> | <input type="checkbox"/> | 11 |
| • Så du at gjerningsmannen rettet pistolen mot deg eller oppdaget du at han skjøt etter deg? .. | <input type="checkbox"/> | <input type="checkbox"/> | 12 |
| • Så du noen bli skadet eller drept? .....                                                      | <input type="checkbox"/> | <input type="checkbox"/> | 13 |
| • Hørte du noen bli skadet eller drept? .....                                                   | <input type="checkbox"/> | <input type="checkbox"/> | 14 |
| • Hjalp du noen som ble alvorlig skadet? .....                                                  | <input type="checkbox"/> | <input type="checkbox"/> | 15 |
| • Var du i berøring med døde eller skadde under angrepet? .....                                 | <input type="checkbox"/> | <input type="checkbox"/> | 16 |
| • Var du redd for at du skulle drukne? .....                                                    | <input type="checkbox"/> | <input type="checkbox"/> | 17 |
| • La du på svøm? .....                                                                          | <input type="checkbox"/> | <input type="checkbox"/> | 18 |
| • Følte du deg truet av politiet (ikke gjerningsmannen) .....                                   | <input type="checkbox"/> | <input type="checkbox"/> | 19 |
| • Så du noen som var døde? .....                                                                | <input type="checkbox"/> | <input type="checkbox"/> | 20 |

**Reaksjoner under hendelsen**

Q2

Instruksjon, les opp:

**De spørsmålene som jeg skal stille nå handler om reaksjoner du kan ha hatt under eller rett etter hendelsen.**

**I hvor stor grad..**

|                                                                                                                       | Ikke i<br>det<br>hele<br>tatt | Litt                          | Noe                           | Mye                           | Veldig<br>mye                 |   |
|-----------------------------------------------------------------------------------------------------------------------|-------------------------------|-------------------------------|-------------------------------|-------------------------------|-------------------------------|---|
| • Var du redd, eller tenkte du at dette var noe av det mest skremmende du har opplevd? .....                          | 0<br><input type="checkbox"/> | 1<br><input type="checkbox"/> | 2<br><input type="checkbox"/> | 3<br><input type="checkbox"/> | 4<br><input type="checkbox"/> | 1 |
| • Følte du at du ikke kunne stoppe det som skjedde, eller at du trengte hjelp fra noen? .....                         | <input type="checkbox"/>      | <input type="checkbox"/>      | <input type="checkbox"/>      | <input type="checkbox"/>      | <input type="checkbox"/>      | 2 |
| • Var du veldig forvirret? .....                                                                                      | <input type="checkbox"/>      | <input type="checkbox"/>      | <input type="checkbox"/>      | <input type="checkbox"/>      | <input type="checkbox"/>      | 3 |
| • Følte du at det som skjedde, på en måte var uvirkelig, som om det skjedde i en film, og ikke i virkeligheten? ..... | <input type="checkbox"/>      | <input type="checkbox"/>      | <input type="checkbox"/>      | <input type="checkbox"/>      | <input type="checkbox"/>      | 4 |
| • Følte du at det du opplevde, var motbydelig eller ekkelt? .....                                                     | <input type="checkbox"/>      | <input type="checkbox"/>      | <input type="checkbox"/>      | <input type="checkbox"/>      | <input type="checkbox"/>      | 5 |
| • Hadde du hjertebank? .....                                                                                          | <input type="checkbox"/>      | <input type="checkbox"/>      | <input type="checkbox"/>      | <input type="checkbox"/>      | <input type="checkbox"/>      | 6 |
| • Var du andpusten? .....                                                                                             | <input type="checkbox"/>      | <input type="checkbox"/>      | <input type="checkbox"/>      | <input type="checkbox"/>      | <input type="checkbox"/>      | 7 |
| • I hvilken grad opplevde du deg selv som følelsesmessig lammet, eller som om du var ved siden av deg selv? .....     | <input type="checkbox"/>      | <input type="checkbox"/>      | <input type="checkbox"/>      | <input type="checkbox"/>      | <input type="checkbox"/>      | 8 |

## Mestringsstrategier

Q3

Instruksjon, les opp:

Nå skal jeg stille deg noen spørsmål om ting man kan si eller gjøre for å hjelpe seg selv når alvorlige ting skjer. Det er ikke noen riktige eller gale måter å reagere på. Bare tenk på hva du gjorde eller sa til deg selv for å få det bedre under terrorangrepet.

|                                                                                       | Aldri                    | Noen ganger              | Ofte                     | Meste-<br>parten<br>av<br>tiden |    |
|---------------------------------------------------------------------------------------|--------------------------|--------------------------|--------------------------|---------------------------------|----|
|                                                                                       | 1                        | 2                        | 3                        | 4                               |    |
| • Jeg tenkte over hvilke muligheter jeg hadde før jeg handlet. ....                   | <input type="checkbox"/> | <input type="checkbox"/> | <input type="checkbox"/> | <input type="checkbox"/>        | 1  |
| • Jeg tenkte på de gode tingene i livet mitt .....                                    | <input type="checkbox"/> | <input type="checkbox"/> | <input type="checkbox"/> | <input type="checkbox"/>        | 2  |
| • Jeg gjorde noe for å forsøke å bedre min situasjon .....                            | <input type="checkbox"/> | <input type="checkbox"/> | <input type="checkbox"/> | <input type="checkbox"/>        | 3  |
| • Jeg prøvde å ikke tenke på det som hendte .....                                     | <input type="checkbox"/> | <input type="checkbox"/> | <input type="checkbox"/> | <input type="checkbox"/>        | 4  |
| • Jeg sa til meg selv at det ville gå bra .....                                       | <input type="checkbox"/> | <input type="checkbox"/> | <input type="checkbox"/> | <input type="checkbox"/>        | 5  |
| • Jeg sa til meg selv at uansett hva som skjer, så kan jeg håndtere det .....         | <input type="checkbox"/> | <input type="checkbox"/> | <input type="checkbox"/> | <input type="checkbox"/>        | 6  |
| • Jeg fantaserte om at alt var i orden .....                                          | <input type="checkbox"/> | <input type="checkbox"/> | <input type="checkbox"/> | <input type="checkbox"/>        | 7  |
| • Jeg ba Gud hjelpe meg .....                                                         | <input type="checkbox"/> | <input type="checkbox"/> | <input type="checkbox"/> | <input type="checkbox"/>        | 8  |
| • Jeg hadde kontakt med andre på øya for å finne ut av hva som var lurt å gjøre ..... | <input type="checkbox"/> | <input type="checkbox"/> | <input type="checkbox"/> | <input type="checkbox"/>        | 9  |
| • Jeg søkte trøst hos noen .....                                                      | <input type="checkbox"/> | <input type="checkbox"/> | <input type="checkbox"/> | <input type="checkbox"/>        | 10 |
| • Jeg holdt meg sammen med andre .....                                                | <input type="checkbox"/> | <input type="checkbox"/> | <input type="checkbox"/> | <input type="checkbox"/>        | 11 |
| • Jeg holdt kontakt med noen som ikke var på øya via sms eller telefon .....          | <input type="checkbox"/> | <input type="checkbox"/> | <input type="checkbox"/> | <input type="checkbox"/>        | 12 |
| • Jeg tenkte på hvorfor dette skjer .....                                             | <input type="checkbox"/> | <input type="checkbox"/> | <input type="checkbox"/> | <input type="checkbox"/>        | 13 |

## Egne skader

INSTRUKSJON: SPØRSMÅLENE OM SKADE SKAL KUN STILLES TIL DE SOM HAR SVART "JA" PÅ SPØRSMÅLET OM DE BLE FYSISK SKADET PÅ SIDE 2 **sva fra Q1.A.10**

Q4

Du har fortalt meg at du ble fysisk skadet på Utøya. Jeg vil nå spørre deg om skadene du fikk og hva slags hjelp du har fått.

Fikk du relativt enkle eller overfladiske skader, som for eksempel overfladiske kutt, skrubbsår eller forstuvning?

Ja .....  1  
Nei .....  2

Q5

Fikk du dypere eller mer alvorlige skader, eksempelvis i forbindelse med nærdrinking, dype kutt, skuddskader eller brudd?

Ja .....  1  
Nei .....  2

Q6

Hvis dypere/mer alvorlige skader, hvor ble du skadet?

Besvar alle punktene

|                | Ja<br>1                  | Nei<br>2                 |   |
|----------------|--------------------------|--------------------------|---|
| • Hode .....   | <input type="checkbox"/> | <input type="checkbox"/> | 1 |
| • Ansikt ..... | <input type="checkbox"/> | <input type="checkbox"/> | 2 |
| • Bryst .....  | <input type="checkbox"/> | <input type="checkbox"/> | 3 |
| • Rygg .....   | <input type="checkbox"/> | <input type="checkbox"/> | 4 |
| • Mage .....   | <input type="checkbox"/> | <input type="checkbox"/> | 5 |
| • Armer .....  | <input type="checkbox"/> | <input type="checkbox"/> | 6 |
| • Ben .....    | <input type="checkbox"/> | <input type="checkbox"/> | 7 |
| • Annet .....  | <input type="checkbox"/> | <input type="checkbox"/> | 8 |

**Q7** Hvis annet, vennligst spesifiser:

Annet, notér \_\_\_\_\_  
\_\_\_\_\_  
\_\_\_\_\_  
\_\_\_\_\_  
\_\_\_\_\_  
\_\_\_\_\_

**Q8** Medførte skadene at du ble bevisstløs?

Ja .....  1  
Nei .....  2

**Q9** Hvis du var ved bevissthet:

Hvor smertepåvirket var du av skadene under hendelsen?

Svar på en skala fra 0 til 10, der 0 = ingen smerte og 10 = den mest ekstreme smerteopplevelsen du kan tenke deg

.....  00  01  02  03  04  05  06  07  08  09  10

**Q10** Ble du behandlet for skader på legevakt?

Ja .....  1  
Nei .....  2

**Q11** Ble du innlagt i sykehus?

Ja .....  1  
Nei .....  2

HVIS NEI, GÅ TIL **q17**

**Q12** Hvilket sykehus?

Ullevål .....  1  
Drammen .....  2  
Hønefoss .....  3  
Bærum .....  4

**Q13** I tilfelle, hvor mange dager var du innlagt?

Noter antall dager

**Q14** Ble du utskrevet fra sykehus til hjemmet?

Ja .....  1  
Nei .....  2

**Q15** Ble du overført til rehabilitering eller annen opptrening (døgnbehandling) før du kom hjem?

Ja .....  1  
Nei .....  2

HVIS JA PÅ Q15

**Q16** Hvor mange dager totalt?

Noter antall dager

**Q17** Ble du behandlet for skader av annen lege eller helsepersonell?

Ja .....  1  
Nei .....  2

**Q18** Har du synlige arr etter skade?

Ja .....  1  
 Nei .....  2

**Q19** Gir skaden(e) smerter i dag?

Ja .....  1  
 Nei .....  2

**Q20** Har skaden endret utseendet ditt?

Ja .....  1  
 Nei .....  2

**Q21** Har du fått fysiske skader som hemmer deg i det daglige? (for eksempel i aktiviteter/fritidsaktiviteter/skolefungering/daglige rutiner?)

Ja .....  1  
 Nei .....  2

**Q22** Har skaden gitt deg andre plager?

Ja .....  1  
 Nei .....  2

HVIS JA

**Q23** Hvilke plager?

Noter \_\_\_\_\_

\_\_\_\_\_

\_\_\_\_\_

\_\_\_\_\_

\_\_\_\_\_

**Q24** Hvor plaget er du av skaden(e) nå?

Ikke i det hele tatt .....  1  
 I liten grad .....  2  
 Noe .....  3  
 I stor grad .....  4  
 I veldig stor grad .....  5

**Familie og venner: Tap og skader.**

**Q25** Ble nær venn, kjæreste eller familiemedlem drept i terrorangrepet?

Ja .....  1  
 Nei .....  2

HVIS JA

**Q26** Hvor?

|                             | Ja<br>1                  | Nei<br>2                 |
|-----------------------------|--------------------------|--------------------------|
| På Utøya .....              | <input type="checkbox"/> | <input type="checkbox"/> |
| I regjeringskvartalet ..... | <input type="checkbox"/> | <input type="checkbox"/> |

HVIS JA

**Q27** Hvem?

Velg en kategori for hver av de drepte nære

|                          | Ja<br>1                  | Nei<br>2                 |
|--------------------------|--------------------------|--------------------------|
| • Nær venn .....         | <input type="checkbox"/> | <input type="checkbox"/> |
| • Kjæreste/partner ..... | <input type="checkbox"/> | <input type="checkbox"/> |
| • Søsken .....           | <input type="checkbox"/> | <input type="checkbox"/> |
| • Forelder .....         | <input type="checkbox"/> | <input type="checkbox"/> |
| • Annen familie .....    | <input type="checkbox"/> | <input type="checkbox"/> |

**Q28** Ble nær venn, kjæreste eller familiemedlem skadet i terrorangrepet? (Slik at de ble behandlet i sykehus)

Ja .....  1  
 Nei .....  2

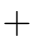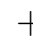

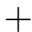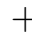

| HVIS JA    |                                                             |                                                   |
|------------|-------------------------------------------------------------|---------------------------------------------------|
| <b>Q29</b> | <b>Hvor?</b>                                                |                                                   |
|            |                                                             | Ja      Nei<br>1      2                           |
|            | På Utøya .....                                              | <input type="checkbox"/> <input type="checkbox"/> |
|            | I regjeringskvartalet .....                                 | <input type="checkbox"/> <input type="checkbox"/> |
| HVIS JA    |                                                             |                                                   |
| <b>Q30</b> | <b>Hvem?</b>                                                |                                                   |
|            |                                                             | Ja      Nei<br>1      2                           |
|            | • Nær venn .....                                            | <input type="checkbox"/> <input type="checkbox"/> |
|            | • Kjæreste/partner .....                                    | <input type="checkbox"/> <input type="checkbox"/> |
|            | • Søsken .....                                              | <input type="checkbox"/> <input type="checkbox"/> |
|            | • Forelder .....                                            | <input type="checkbox"/> <input type="checkbox"/> |
|            | • Annen familie .....                                       | <input type="checkbox"/> <input type="checkbox"/> |
| <b>Q31</b> | <b>Ble noen ungdommer fra fylkeslaget ditt i AUF drept?</b> |                                                   |
|            | Ja .....                                                    | <input type="checkbox"/> 1                        |
|            | Nei .....                                                   | <input type="checkbox"/> 2                        |
|            | Ikke aktuelt .....                                          | <input type="checkbox"/> 3                        |

| HVIS JA    |                                                                                                   |                            |
|------------|---------------------------------------------------------------------------------------------------|----------------------------|
| <b>Q32</b> | <b>Hvis ja, angi hvor mange:</b>                                                                  |                            |
|            | Noter antall. Vet ikke antall = ubesvart <input style="width: 50px;" type="text"/>                |                            |
| <b>Q33</b> | <b>Ble noen ungdommer fra fylkeslaget ditt i AUF skadet? (Slik at de ble behandlet i sykehus)</b> |                            |
|            | Ja .....                                                                                          | <input type="checkbox"/> 1 |
|            | Nei .....                                                                                         | <input type="checkbox"/> 2 |
|            | Ikke aktuelt .....                                                                                | <input type="checkbox"/> 3 |

| HVIS JA    |                                                                                    |
|------------|------------------------------------------------------------------------------------|
| <b>Q34</b> | <b>Angi hvor mange</b>                                                             |
|            | Noter antall. Vet ikke antall = ubesvart <input style="width: 50px;" type="text"/> |

### Sikkerhet og gjenforening

(Hjelp til intervjuer: Skytingen startet kl 17.22, Beredskapsstroppen pågrep gjerningsmann kl 18.27.)

|            |                                                                                                               |
|------------|---------------------------------------------------------------------------------------------------------------|
| <b>Q35</b> | <b>Når kom du i sikkerhet etter skytingen på Utøya? Ca kl.</b>                                                |
|            | Noter klokkeslett ..... <input style="width: 30px;" type="text"/> / <input style="width: 30px;" type="text"/> |

|            |                                                                                                                          |
|------------|--------------------------------------------------------------------------------------------------------------------------|
| <b>Q36</b> | <b>Når ble du gjenforent med en av dine nærmeste? (den første du ble gjenforent med av nær familie/partner/kjæreste)</b> |
|            | Fredag ca kl. .... <input style="width: 30px;" type="text"/> / <input style="width: 30px;" type="text"/>                 |
|            | Lørdag ca kl. .... <input style="width: 30px;" type="text"/> / <input style="width: 30px;" type="text"/>                 |
|            | Senere .....                                                                                                             |

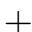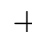



# Reaksjoner den siste måneden

## Posttraumatiske stress reaksjoner

### Instruksjon som leses opp:

Nå har vi snakket om hendelsene og hva du opplevde under terrorangrepet på Utøya og like etterpå. Man kan få ulike reaksjoner på dramatiske hendelser. Nå kommer jeg til å lese opp noen påstander om mulige reaksjoner etter terrorangrepet på Utøya 22. juli. For hver påstand vil jeg spørre hvor ofte du har opplevd å ha det slik **DEN SISTE MÅNEDEN**.

Her er et skjema som er til hjelp når du skal svare på hvor ofte du har opplevd problemet den siste måneden.

|                                                                                                                    |                                                                                                                                            |                          |                          |                          |                          |                          |    |
|--------------------------------------------------------------------------------------------------------------------|--------------------------------------------------------------------------------------------------------------------------------------------|--------------------------|--------------------------|--------------------------|--------------------------|--------------------------|----|
| Ta frem frekvensarket og legg på bordet mellom dere. Gå gjennom de ulike alternativene før dere starter på listen. |                                                                                                                                            |                          |                          |                          |                          |                          |    |
| <b>Q37</b>                                                                                                         | <b>Hvor mye av tiden den siste måneden</b>                                                                                                 |                          |                          |                          |                          |                          |    |
|                                                                                                                    |                                                                                                                                            | Aldri                    | Sjelden                  | Noen ganger              | Ofte                     | Nesten alltid            |    |
|                                                                                                                    |                                                                                                                                            | 1                        | 2                        | 3                        | 4                        | 5                        |    |
|                                                                                                                    | • D4 Jeg er på vakt for fare eller ting jeg er redd for. ....                                                                              | <input type="checkbox"/> | <input type="checkbox"/> | <input type="checkbox"/> | <input type="checkbox"/> | <input type="checkbox"/> | 1  |
|                                                                                                                    | • B4 Når noe minner meg om det som skjedde på Utøya 22. juli, blir jeg veldig ute av meg, redd eller trist. ....                           | <input type="checkbox"/> | <input type="checkbox"/> | <input type="checkbox"/> | <input type="checkbox"/> | <input type="checkbox"/> | 2  |
|                                                                                                                    | • B1 Jeg får skremmende tanker, ser for meg bilder eller hører lyder fra det som skjedde på Utøya 22. juli, selv om jeg ikke vil det. .... | <input type="checkbox"/> | <input type="checkbox"/> | <input type="checkbox"/> | <input type="checkbox"/> | <input type="checkbox"/> | 3  |
|                                                                                                                    | • D2 Jeg føler meg sur, sint eller rasende. ....                                                                                           | <input type="checkbox"/> | <input type="checkbox"/> | <input type="checkbox"/> | <input type="checkbox"/> | <input type="checkbox"/> | 4  |
|                                                                                                                    | • B2 Jeg drømmer om det som skjedde på Utøya 22. juli eller har mareritt om andre ting. ....                                               | <input type="checkbox"/> | <input type="checkbox"/> | <input type="checkbox"/> | <input type="checkbox"/> | <input type="checkbox"/> | 5  |
|                                                                                                                    | • B3 Jeg føler at jeg er tilbake til da det ubehagelige skjedde på Utøya 22. juli, og opplever det om igjen. ....                          | <input type="checkbox"/> | <input type="checkbox"/> | <input type="checkbox"/> | <input type="checkbox"/> | <input type="checkbox"/> | 6  |
|                                                                                                                    | • C4 Jeg har lyst til å være alene og ikke sammen med venner. ....                                                                         | <input type="checkbox"/> | <input type="checkbox"/> | <input type="checkbox"/> | <input type="checkbox"/> | <input type="checkbox"/> | 7  |
|                                                                                                                    | • C5 Jeg føler meg alene inni meg og føler ikke nærhet til andre mennesker. ....                                                           | <input type="checkbox"/> | <input type="checkbox"/> | <input type="checkbox"/> | <input type="checkbox"/> | <input type="checkbox"/> | 8  |
|                                                                                                                    | • C1 Jeg forsøker å ikke snakke om det som skjedde på Utøya 22. juli, tenke på det eller ha følelser rundt det. ....                       | <input type="checkbox"/> | <input type="checkbox"/> | <input type="checkbox"/> | <input type="checkbox"/> | <input type="checkbox"/> | 9  |
|                                                                                                                    | • C6 Jeg har problemer med å føle glede eller kjærlighet. ....                                                                             | <input type="checkbox"/> | <input type="checkbox"/> | <input type="checkbox"/> | <input type="checkbox"/> | <input type="checkbox"/> | 10 |
|                                                                                                                    | • C6 Jeg har problemer med å føle tristhet eller sinne. ....                                                                               | <input type="checkbox"/> | <input type="checkbox"/> | <input type="checkbox"/> | <input type="checkbox"/> | <input type="checkbox"/> | 11 |
|                                                                                                                    | • D5 Jeg blir lett urolig eller skvetter lett, for eksempel når jeg hører høye lyder eller når noe overrasker meg. ....                    | <input type="checkbox"/> | <input type="checkbox"/> | <input type="checkbox"/> | <input type="checkbox"/> | <input type="checkbox"/> | 12 |
|                                                                                                                    | • D1 Jeg har problemer med å få sove eller jeg våkner ofte om natten. ....                                                                 | <input type="checkbox"/> | <input type="checkbox"/> | <input type="checkbox"/> | <input type="checkbox"/> | <input type="checkbox"/> | 13 |
|                                                                                                                    | • AF Jeg bebreider meg selv for noe av det som skjedde på Utøya 22. juli. ....                                                             | <input type="checkbox"/> | <input type="checkbox"/> | <input type="checkbox"/> | <input type="checkbox"/> | <input type="checkbox"/> | 14 |
|                                                                                                                    | • C3 Jeg har problemer med å huske viktige ting fra det som skjedde på Utøya 22.juli. ....                                                 | <input type="checkbox"/> | <input type="checkbox"/> | <input type="checkbox"/> | <input type="checkbox"/> | <input type="checkbox"/> | 15 |
|                                                                                                                    | • D3 Jeg har problemer med å konsentrere meg eller være oppmerksom. ....                                                                   | <input type="checkbox"/> | <input type="checkbox"/> | <input type="checkbox"/> | <input type="checkbox"/> | <input type="checkbox"/> | 16 |
|                                                                                                                    | • C2 Jeg forsøker å holde meg unna folk, steder eller ting som minner meg om det som skjedde på Utøya 22.juli. ....                        | <input type="checkbox"/> | <input type="checkbox"/> | <input type="checkbox"/> | <input type="checkbox"/> | <input type="checkbox"/> | 17 |

### Hvor mye av tiden den siste måneden

|                                                                                                                                                                                                           | Aldri                    | Sjelden                  | Noen ganger              | Ofte                     | Nesten alltid            |    |
|-----------------------------------------------------------------------------------------------------------------------------------------------------------------------------------------------------------|--------------------------|--------------------------|--------------------------|--------------------------|--------------------------|----|
| • B5 Når noe minner meg om det som skjedde på Utøya 22. juli, får jeg sterke følelser i kroppen, for eksempel hjertebank, hodepine eller mageknip. ....                                                   | <input type="checkbox"/> | <input type="checkbox"/> | <input type="checkbox"/> | <input type="checkbox"/> | <input type="checkbox"/> | 18 |
| • C7 Jeg tror ikke at jeg kommer til å leve lenge. ....                                                                                                                                                   | <input type="checkbox"/> | <input type="checkbox"/> | <input type="checkbox"/> | <input type="checkbox"/> | <input type="checkbox"/> | 19 |
| • D2 Jeg krangler eller slåss mye .....                                                                                                                                                                   | <input type="checkbox"/> | <input type="checkbox"/> | <input type="checkbox"/> | <input type="checkbox"/> | <input type="checkbox"/> | 20 |
| • C7 Jeg er negativ eller pessimistisk når jeg tenker på fremtiden .....                                                                                                                                  | <input type="checkbox"/> | <input type="checkbox"/> | <input type="checkbox"/> | <input type="checkbox"/> | <input type="checkbox"/> | 21 |
| • AF Jeg er redd for at noe lignende som det som skjedde på Utøya 22. juli skal skje igjen. ....                                                                                                          | <input type="checkbox"/> | <input type="checkbox"/> | <input type="checkbox"/> | <input type="checkbox"/> | <input type="checkbox"/> | 22 |
| • Nye D3 Jeg er sint på noen andre for at de ikke gjorde mer for å forhindre det som skjedde på Utøya 22. juli, eller for at de ikke har gjort nok etterpå (gjelder ikke sinne mot gjerningsmannen). .... | <input type="checkbox"/> | <input type="checkbox"/> | <input type="checkbox"/> | <input type="checkbox"/> | <input type="checkbox"/> | 23 |
| • Nye D2 Jeg tenker at andre vonde ting vil skje med meg i fremtiden. ....                                                                                                                                | <input type="checkbox"/> | <input type="checkbox"/> | <input type="checkbox"/> | <input type="checkbox"/> | <input type="checkbox"/> | 24 |
| • Nye E2 Jeg gjør ting som skader eller kan skade meg selv eller andre. (For eksempel å kjøre for fort, bruke narkotika, drikke veldig mye, skade meg selv eller gjøre andre farlige ting). ....          | <input type="checkbox"/> | <input type="checkbox"/> | <input type="checkbox"/> | <input type="checkbox"/> | <input type="checkbox"/> | 25 |
| • Nye D3 Jeg klandrer meg selv for at jeg ikke er blitt fortere bra. ....                                                                                                                                 | <input type="checkbox"/> | <input type="checkbox"/> | <input type="checkbox"/> | <input type="checkbox"/> | <input type="checkbox"/> | 26 |
| • Nye D4 Jeg skammer meg over noe av det som skjedde på Utøya 22. juli. ....                                                                                                                              | <input type="checkbox"/> | <input type="checkbox"/> | <input type="checkbox"/> | <input type="checkbox"/> | <input type="checkbox"/> | 27 |
| • Nye D4 Det som hendte var så motbydelig og frastøtende at jeg føler meg dårlig, blir kvalm eller føler avsky når jeg tenker på det. ....                                                                | <input type="checkbox"/> | <input type="checkbox"/> | <input type="checkbox"/> | <input type="checkbox"/> | <input type="checkbox"/> | 28 |
| • Nye D2 Jeg tenker at verden er utrygg, og at jeg ikke er godt nok beskyttet. ....                                                                                                                       | <input type="checkbox"/> | <input type="checkbox"/> | <input type="checkbox"/> | <input type="checkbox"/> | <input type="checkbox"/> | 29 |
| • Nye D3 Jeg har sterke følelser om hevn .....                                                                                                                                                            | <input type="checkbox"/> | <input type="checkbox"/> | <input type="checkbox"/> | <input type="checkbox"/> | <input type="checkbox"/> | 30 |
| • Nye D3 Jeg klandrer meg selv for at jeg lot det som skjedde på Utøya 22. juli endre meg så mye. ....                                                                                                    | <input type="checkbox"/> | <input type="checkbox"/> | <input type="checkbox"/> | <input type="checkbox"/> | <input type="checkbox"/> | 31 |
| • Nye D4 Jeg føler meg veldig redd. ....                                                                                                                                                                  | <input type="checkbox"/> | <input type="checkbox"/> | <input type="checkbox"/> | <input type="checkbox"/> | <input type="checkbox"/> | 32 |
| • Nye D2 Jeg tenker negativt om meg selv, for eksempel at jeg er et dårlig menneske, eller et menneske som ikke stoler på andre. ....                                                                     | <input type="checkbox"/> | <input type="checkbox"/> | <input type="checkbox"/> | <input type="checkbox"/> | <input type="checkbox"/> | 33 |

### Når du blir minnet på det som skjedde

**Q38** Det er vanlig at ulike situasjoner eller ting omkring oss minner oss om fæle ting som har skjedd. I denne sammenhengen kaller vi dette påminnere. Slike påminnere kan være bestemte steder du går, mennesker eller ting du ser, lyder du hører, ting du ser på TV, eller følelser. Fortell meg hva som minner deg om hendelsene på Utøya 22. juli. Beskriv (så mange som de kommer på):

Noter \_\_\_\_\_

\_\_\_\_\_

\_\_\_\_\_

\_\_\_\_\_

\_\_\_\_\_

\_\_\_\_\_

## Depresjon og angst

Q39

Instruksjon, les opp:

Jeg vil nå spørre deg om noen plager man kan ha uten at de nødvendigvis er relatert til det man har opplevd. Angi i hvilken grad du har vært plaget av hvert enkelt problem i løpet av DE SISTE 14 DAGENE. Sett ett kryss for hver linje.

|                                                     | Ikke plaget              | Litt plaget              | Ganske mye plaget        | Veldig mye plaget        |   |
|-----------------------------------------------------|--------------------------|--------------------------|--------------------------|--------------------------|---|
|                                                     | 1                        | 2                        | 3                        | 4                        |   |
| • Stadig redd eller engstelig .....                 | <input type="checkbox"/> | <input type="checkbox"/> | <input type="checkbox"/> | <input type="checkbox"/> | 1 |
| • Nervøsitet, indre uro .....                       | <input type="checkbox"/> | <input type="checkbox"/> | <input type="checkbox"/> | <input type="checkbox"/> | 2 |
| • Følelse av håpløshet med tanke på fremtiden ..... | <input type="checkbox"/> | <input type="checkbox"/> | <input type="checkbox"/> | <input type="checkbox"/> | 3 |
| • Nedtrykt, tungsindig .....                        | <input type="checkbox"/> | <input type="checkbox"/> | <input type="checkbox"/> | <input type="checkbox"/> | 4 |
| • Mye bekymret eller urolig .....                   | <input type="checkbox"/> | <input type="checkbox"/> | <input type="checkbox"/> | <input type="checkbox"/> | 5 |
| • Følelse av at alt er et slit .....                | <input type="checkbox"/> | <input type="checkbox"/> | <input type="checkbox"/> | <input type="checkbox"/> | 6 |
| • Følelse av å være anspent, oppjaget .....         | <input type="checkbox"/> | <input type="checkbox"/> | <input type="checkbox"/> | <input type="checkbox"/> | 7 |
| • Plutselig frykt uten grunn .....                  | <input type="checkbox"/> | <input type="checkbox"/> | <input type="checkbox"/> | <input type="checkbox"/> | 8 |
| • Tanker om å ta ditt liv .....                     | <input type="checkbox"/> | <input type="checkbox"/> | <input type="checkbox"/> | <input type="checkbox"/> | 9 |

DERSOM UNGDOMMEN SVARER POSITIVT PÅ DETTE SPØRSMÅLET, SKAL DET TAS OPP PÅ SLUTTEN AV INTERVJUET.

## Redsel

Q40

Her kommer noen påstander om hvordan man kan føle seg. I hvilken grad stemmer utsagnene med hvordan du har hatt det DE SISTE 3 MÅNEDENE?

|                                                      | Stemmer ikke /<br>stemmer nesten<br>aldri | Ganske godt /<br>stemmer noen<br>ganger | Stemmer veldig<br>godt / stemmer ofte |   |
|------------------------------------------------------|-------------------------------------------|-----------------------------------------|---------------------------------------|---|
|                                                      | 1                                         | 2                                       | 3                                     |   |
| • Jeg er redd for å sove alene .....                 | <input type="checkbox"/>                  | <input type="checkbox"/>                | <input type="checkbox"/>              | 1 |
| • Jeg er redd for å være alene hjemme .....          | <input type="checkbox"/>                  | <input type="checkbox"/>                | <input type="checkbox"/>              | 2 |
| • Jeg liker ikke å være borte fra familien min ..... | <input type="checkbox"/>                  | <input type="checkbox"/>                | <input type="checkbox"/>              | 3 |

## Dissosiasjon

### Q41 Har du opplevd eller følt noe av dette siden det som skjedde på Utøya 22. juli?

Instruksjon: Det dreier seg ikke om dissosiasjon dersom ungdommen har vært påvirket av narkotika/alkohol/medikamenter. I så fall, svar nei på spørsmålet

|                                                                                                                                                                                                                            | Ja                            | Nei                           |   |
|----------------------------------------------------------------------------------------------------------------------------------------------------------------------------------------------------------------------------|-------------------------------|-------------------------------|---|
| • Har du noen ganger sterke følelser eller tanker som ikke virker som om de er dine, eller følelse av at kroppen din ikke tilhører deg, som om du står utenfor deg selv for eksempel som du ser deg selv på en film? ..... | 1<br><input type="checkbox"/> | 2<br><input type="checkbox"/> | 1 |
| • Er det ting som har skjedd eller ting om deg selv som du har blitt fortalt, men som du ikke selv kan huske? .....                                                                                                        | <input type="checkbox"/>      | <input type="checkbox"/>      | 2 |
| • Har du opplevd at tiden har gått uten at du er sikker på hva du har gjort? Eller være et sted uten å huske hvordan du kom dit? .....                                                                                     | <input type="checkbox"/>      | <input type="checkbox"/>      | 3 |
| • Har du noen gang vært forvirret med hensyn til hvem du er eller følt deg som en annen person, eller flere personer? .....                                                                                                | <input type="checkbox"/>      | <input type="checkbox"/>      | 4 |
| • Har det hendt at du plutselig har mistet følelsen i kroppen, mistet evnen til å snakke, mistet synet eller hørselen eller plutselig ikke klart å svelge? .....                                                           | <input type="checkbox"/>      | <input type="checkbox"/>      | 5 |

## Sorg

Q42 Instruksjon: Hvis en nær person (svart JA i **q25** ) eller noen i fylkeslaget til ungdommen døde i terrorangrepet, (svart JA i **q31** ) spør om sorg. (Hvis det er mer enn et tap ber du ungdommen svare i forhold til det tapet som er vanskeligst):

**Du har fortalt meg at du mistet ..... (si navnet, ikke skriv det) i terrorangrepet. Jeg vil nå stille deg noen spørsmål om hvordan det har vært for deg etter at ..... døde.**

|                                                                                                                                                                                                                                                                                                                                     | Ikke i det hele tatt          | Noe                           | Mye                           |   |
|-------------------------------------------------------------------------------------------------------------------------------------------------------------------------------------------------------------------------------------------------------------------------------------------------------------------------------------|-------------------------------|-------------------------------|-------------------------------|---|
| • Hvor vanskelig synes du nå det er å godta at _____ er død? .....                                                                                                                                                                                                                                                                  | 1<br><input type="checkbox"/> | 2<br><input type="checkbox"/> | 3<br><input type="checkbox"/> | 1 |
| • Hvor mye påvirker sorgen din livet ditt nå? .....                                                                                                                                                                                                                                                                                 | <input type="checkbox"/>      | <input type="checkbox"/>      | <input type="checkbox"/>      | 2 |
| • Hvor mye er du plaget av bilder av eller tanker på _____ når hun/han døde, eller av andre tanker omkring dødsfallet som virkelig plager deg? .....                                                                                                                                                                                | <input type="checkbox"/>      | <input type="checkbox"/>      | <input type="checkbox"/>      | 3 |
| • Er det ting du pleide å gjøre mens _____ var i live som du ikke lenger er komfortabel med å gjøre, og som du unngår? Som for eksempel å gå steder dit du gikk sammen med henne/ham, eller gjøre ting som dere likte å gjøre sammen? Eller unngå å se på bilder av eller snakke om _____ ? Hvor mye unngår du disse tingene? ..... | <input type="checkbox"/>      | <input type="checkbox"/>      | <input type="checkbox"/>      | 4 |
| • Hvor mye føler du deg avskåret eller fjern fra andre mennesker etter at _____ døde, også mennesker du pleide å være nær, som familie eller venner? .....                                                                                                                                                                          | <input type="checkbox"/>      | <input type="checkbox"/>      | <input type="checkbox"/>      | 5 |
| • Lengter du etter den som døde? .....                                                                                                                                                                                                                                                                                              | <input type="checkbox"/>      | <input type="checkbox"/>      | <input type="checkbox"/>      | 6 |

## Begravelser

**Q43** Har du vært i begravelser relatert til terrorangrepene 22. juli 2011?

Ja .....  1  
Nei .....  2

HVIS JA

**Q44** Hvor mange?

Noter antall

1

## Somatiske helseplager

**Q45** Under er en liste over kroppslige plager man noen ganger kan ha. Hvor mye ha du vært plaget av dette i løpet av DE SISTE 2 UKENE?

|                                                                                               | Ikke plaget              | Litt plaget              | Ganske mye plaget        | Veldig mye plaget        |   |
|-----------------------------------------------------------------------------------------------|--------------------------|--------------------------|--------------------------|--------------------------|---|
|                                                                                               | 1                        | 2                        | 3                        | 4                        |   |
| • Vondt i magen (mageknip) .....                                                              | <input type="checkbox"/> | <input type="checkbox"/> | <input type="checkbox"/> | <input type="checkbox"/> | 1 |
| • Vondt i hodet .....                                                                         | <input type="checkbox"/> | <input type="checkbox"/> | <input type="checkbox"/> | <input type="checkbox"/> | 2 |
| • Vondt i korsryggen .....                                                                    | <input type="checkbox"/> | <input type="checkbox"/> | <input type="checkbox"/> | <input type="checkbox"/> | 3 |
| • Vondt i armer eller bein .....                                                              | <input type="checkbox"/> | <input type="checkbox"/> | <input type="checkbox"/> | <input type="checkbox"/> | 4 |
| • Følelse av å skulle besvime eller svimmelhet .....                                          | <input type="checkbox"/> | <input type="checkbox"/> | <input type="checkbox"/> | <input type="checkbox"/> | 5 |
| • Hjertet slår for fort (selv når du ikke trener) .....                                       | <input type="checkbox"/> | <input type="checkbox"/> | <input type="checkbox"/> | <input type="checkbox"/> | 6 |
| • Kvalme eller mageproblem (følelse av å ville kaste opp, eller av at magen er i ulage) ..... | <input type="checkbox"/> | <input type="checkbox"/> | <input type="checkbox"/> | <input type="checkbox"/> | 7 |
| • Kraftløshet (å føle seg svak) i deler av kroppen .....                                      | <input type="checkbox"/> | <input type="checkbox"/> | <input type="checkbox"/> | <input type="checkbox"/> | 8 |

## Hodepine

**Q46** Nå vil jeg spørre deg litt mer om hodepine.

Har du hatt tilbakevendende hodepine i løpet av DE SISTE 3 MND, (som ikke skyldes forkjølelse eller annen sykdom)?

Nei .....  1  
Ja .....  2

Q47

Instruksjon: Hvis ungdommen svarer Ja, les først begge beskrivelsene nedenfor og be ham eller henne angi hvilke(t) alternativ som passer, og symptomhyppighet. Enkelte kan ha begge typer hodepine. Kryss da av for begge alternativer. For noen passer verken beskrivelse 1 eller 2. Kryss da av for alternativ 3.

**Jeg leser nå opp en beskrivelse av to typer hodepine, så kan du angi om en, begge eller ingen av alternativene beskriver dine plager.**

|     |                            |                   |                   |                         |
|-----|----------------------------|-------------------|-------------------|-------------------------|
| Nei | Mindre enn en gang per mnd | 1-3 dager per mnd | 1-4 dager per uke | Mer enn 4 dager per uke |
|-----|----------------------------|-------------------|-------------------|-------------------------|

- **Alternativ 1:** Min hodepine kommer ofte som anfall, den er middels sterk eller sterk, og kan begynne på den ene siden. Hodepinen er bankende (dunkende) eller pulserende og jeg føler meg ofte kvalm eller må kaste opp. Når jeg har hodepine tåler jeg dårlig sterkt lys eller lyd, og vil helst ikke bevege hodet. ....

|                          |                          |                          |                          |                          |
|--------------------------|--------------------------|--------------------------|--------------------------|--------------------------|
| 1                        | 2                        | 3                        | 4                        | 5                        |
| <input type="checkbox"/> | <input type="checkbox"/> | <input type="checkbox"/> | <input type="checkbox"/> | <input type="checkbox"/> |

1

- **Alternativ 2:** Min hodepine kommer ofte smygende, den er lett eller middels sterk og sitter ofte i hele hodet (eller nakken eller midt oppå hodet). Den føles som et press eller trykk (som et bånd rundt hodet), eller er verkende. Vanligvis er jeg ikke kvalm eller må kaste opp. Når jeg har denne hodepinen klarer jeg vanligvis å fortsette med for eksempel skolearbeid eller lekselesing og vanlig fysisk aktivitet. ....

|                          |                          |                          |                          |                          |
|--------------------------|--------------------------|--------------------------|--------------------------|--------------------------|
| <input type="checkbox"/> | <input type="checkbox"/> | <input type="checkbox"/> | <input type="checkbox"/> | <input type="checkbox"/> |
|--------------------------|--------------------------|--------------------------|--------------------------|--------------------------|

2

- **Alternativ 3:** Verken beskrivelse 1 eller 2 passer med mine hodepineplager. ....

|                          |                          |                          |                          |                          |
|--------------------------|--------------------------|--------------------------|--------------------------|--------------------------|
| <input type="checkbox"/> | <input type="checkbox"/> | <input type="checkbox"/> | <input type="checkbox"/> | <input type="checkbox"/> |
|--------------------------|--------------------------|--------------------------|--------------------------|--------------------------|

3

## Alkohol/medikamenter

**Q48** Har du drukket alkohol i løpet av de siste 4 ukene?

Ja .....  1  
 Nei .....  2

HVIS NEI, GÅ TIL **q51**

**Q49** Omtrent hvor mange ganger har du drukket alkohol i løpet av de siste 4 ukene?

1-2 ganger .....  1  
 3-5 ganger .....  2  
 6-9 ganger .....  3  
 10-19 ganger .....  4  
 Oftere .....  5

**Q50** Omtrent hvor mange ganger har du kjent deg tydelig beruset i løpet av de siste 4 ukene?

Ingen ganger .....  1  
 1-2 ganger .....  2  
 3-5 ganger .....  3  
 6-9 ganger .....  4  
 10 ganger eller mer .....  5

**Q51 I løpet av de siste 4 ukene, hvor ofte har du brukt følgende medisiner?**

Sett et kryss på hver linje

|                                   | Daglig                   | Hver uke, men ikke daglig | Sjeldnere enn hver uke   | Ikke brukt siste 4 uker  |
|-----------------------------------|--------------------------|---------------------------|--------------------------|--------------------------|
|                                   | 1                        | 2                         | 3                        | 4                        |
| • Smertestillende medisiner ..... | <input type="checkbox"/> | <input type="checkbox"/>  | <input type="checkbox"/> | <input type="checkbox"/> |
| • Sovemedisin .....               | <input type="checkbox"/> | <input type="checkbox"/>  | <input type="checkbox"/> | <input type="checkbox"/> |
| • Beroligende medisin .....       | <input type="checkbox"/> | <input type="checkbox"/>  | <input type="checkbox"/> | <input type="checkbox"/> |
| • Medisin mot depresjon .....     | <input type="checkbox"/> | <input type="checkbox"/>  | <input type="checkbox"/> | <input type="checkbox"/> |

**Sosial støtte****Q52 Nå skal jeg lese opp noen påstander om omsorg og støtte. Jeg vil be deg om å vurdere disse påstandene i forhold til din egen situasjon nå.**

|                                                                                                                  | Så mye jeg ønsker        | Nesten så mye jeg ønsker | Noe, men jeg ville ønsket mer | Mindre enn jeg ønsker    | Mye mindre enn jeg ønsker |
|------------------------------------------------------------------------------------------------------------------|--------------------------|--------------------------|-------------------------------|--------------------------|---------------------------|
|                                                                                                                  | 1                        | 2                        | 3                             | 4                        | 5                         |
| • Jeg har mennesker rundt meg som bryr seg om hva som skjer med meg .....                                        | <input type="checkbox"/> | <input type="checkbox"/> | <input type="checkbox"/>      | <input type="checkbox"/> | <input type="checkbox"/>  |
| • Jeg får kjærlighet og omsorg .....                                                                             | <input type="checkbox"/> | <input type="checkbox"/> | <input type="checkbox"/>      | <input type="checkbox"/> | <input type="checkbox"/>  |
| • Jeg har mulighet til å snakke med noen om arbeid-/skole-/studieproblemene mine. ....                           | <input type="checkbox"/> | <input type="checkbox"/> | <input type="checkbox"/>      | <input type="checkbox"/> | <input type="checkbox"/>  |
| • Jeg har mulighet til å snakke med noen jeg stoler på om mine personlige problemer eller familieproblemer ..... | <input type="checkbox"/> | <input type="checkbox"/> | <input type="checkbox"/>      | <input type="checkbox"/> | <input type="checkbox"/>  |
| • Jeg blir bedt med ut for å gjøre ting med andre mennesker. ....                                                | <input type="checkbox"/> | <input type="checkbox"/> | <input type="checkbox"/>      | <input type="checkbox"/> | <input type="checkbox"/>  |
| • Jeg får nyttige råd om viktige ting i livet. ....                                                              | <input type="checkbox"/> | <input type="checkbox"/> | <input type="checkbox"/>      | <input type="checkbox"/> | <input type="checkbox"/>  |
| • Jeg får hjelp når jeg ligger syk til sengs. ....                                                               | <input type="checkbox"/> | <input type="checkbox"/> | <input type="checkbox"/>      | <input type="checkbox"/> | <input type="checkbox"/>  |

**Skole**SPØRSMÅLENE **q53** TIL **q58** BESVARES BARE AV DE SOM GÅR PÅ SKOLE ELLER STUDERER**Q53 Startet du på en ny skole/studiested denne høsten?**Ja .....  1  
Nei .....  2**Q54 Kontaktet skolen deg for å tilrettelegge din skole/studiestart?**Ja .....  1  
Nei .....  2**Q55 Har skolen gjort noe spesielt for å ivareta din læringssituasjon, fordi du var på Utøya?**Ja .....  1  
Nei .....  2**Q56 Opplever du at dine skoleprestasjoner har endret seg i forhold til forrige skoleår?**Dårligere .....  1  
Uendret .....  2  
Bedre .....  3**Q57 Har din trivsel på skolen endret seg i forhold til forrige skoleår?**Dårligere .....  1  
Uendret .....  2  
Bedre .....  3**Q58 Har du en som er ansatt på skolen/studiestedet som du kan snakke med dersom du trenger det?**Ja .....  1  
Nei .....  2

## Avhørserfaringer

**Q59** Nå stiller jeg deg noen spørsmål om politiavhør i forbindelse med Utøya. Har du vært i avhør etter hendelsen på Utøya?

- |                     | Ja<br>1                  | Nei<br>2                 |
|---------------------|--------------------------|--------------------------|
| • Politiavhør ..... | <input type="checkbox"/> | <input type="checkbox"/> |
| • Dommeravhør ..... | <input type="checkbox"/> | <input type="checkbox"/> |

HVIS NEI PÅ BEGGE, HOPP OVER RESTEN AV SPØRSMÅLENE OM AVHØRSERFARINGER, OG GÅ TIL **q63**

**Q60** Hvor ble avhøret gjennomført?

Kryss av det som er korrekt

- |                    |                          |   |
|--------------------|--------------------------|---|
| På Barnehus .....  | <input type="checkbox"/> | 1 |
| Hos politiet ..... | <input type="checkbox"/> | 2 |
| Hjemme .....       | <input type="checkbox"/> | 3 |
| Annet sted .....   | <input type="checkbox"/> | 4 |

**Q61** Hvor lenge varte selve avhøret?

- |                                  |                          |   |
|----------------------------------|--------------------------|---|
| Under 1 time .....               | <input type="checkbox"/> | 1 |
| f.o.m. 1 time til 2 timer .....  | <input type="checkbox"/> | 2 |
| f.o.m. 2 timer til 3 timer ..... | <input type="checkbox"/> | 3 |
| 3 timer eller mer .....          | <input type="checkbox"/> | 4 |

Instruks til intervjuer: Les opp:

### Fortell hvordan du opplevde å bli avhørt av politiet.

Pass på at diktafonen står på

La informanten fortelle mest mulig fritt

Hjelp informanten videre ved å si: Hva opplevde du?

Hjelp informanten til å utdype ved å si: Fortell meg om det. Eller gjenta det siste de sa.

**Q62** (Instruksjon: les høyt)

Nå skal jeg stille deg noen mer detaljerte spørsmål om avhøret.

I hvilken grad...

- |                                                                                                            | Ikke i<br>det<br>hele<br>tatt<br>1 | I liten<br>grad<br>2     | Til dels<br>3            | I stor<br>grad<br>4      | I meget<br>stor<br>grad<br>5 |   |
|------------------------------------------------------------------------------------------------------------|------------------------------------|--------------------------|--------------------------|--------------------------|------------------------------|---|
| • Opplevde du avhøret som nyttig for deg? .....                                                            | <input type="checkbox"/>           | <input type="checkbox"/> | <input type="checkbox"/> | <input type="checkbox"/> | <input type="checkbox"/>     | 1 |
| • Opplevde du avhøret belastende? .....                                                                    | <input type="checkbox"/>           | <input type="checkbox"/> | <input type="checkbox"/> | <input type="checkbox"/> | <input type="checkbox"/>     | 2 |
| • Opplevde du at du ble lyttet til og forstått da du fortalte om dine opplevelser fra Utøya i avhør? ..... | <input type="checkbox"/>           | <input type="checkbox"/> | <input type="checkbox"/> | <input type="checkbox"/> | <input type="checkbox"/>     | 3 |
| • Fikk du sterke følelsesmessige reaksjoner som var vanskelig å håndtere under avhøret? .....              | <input type="checkbox"/>           | <input type="checkbox"/> | <input type="checkbox"/> | <input type="checkbox"/> | <input type="checkbox"/>     | 4 |
| • Fikk du sterke følelsesmessige reaksjoner som var vanskelig å håndtere i dagene etter avhøret? .....     | <input type="checkbox"/>           | <input type="checkbox"/> | <input type="checkbox"/> | <input type="checkbox"/> | <input type="checkbox"/>     | 5 |



Spørsmålene **q63** til **q107** fylles ut av informanten med assistanse av intervjuer.

Husk å gjøre vurdering av udekket hjelpebehov og om neste kontakt før du avslutter!

### Hjelpetiltak og besøk på Utøya

**Q63** Var du med på en av tilbakereisene til Utøya

Ja .....  1  
 Nei .....  2

HVIS JA

**Q64** I hvilken grad opplevde du tilbakereisen som nyttig?

Ikke i det hele tatt .....  1  
 I liten grad .....  2  
 I noen grad .....  3  
 I stor grad .....  4  
 I meget stor grad .....  5

**Q65** I hvilken grad opplevde du tilbakereisen som en belastning?

Ikke i det hele tatt .....  1  
 I liten grad .....  2  
 I noen grad .....  3  
 I stor grad .....  4  
 I meget stor grad .....  5

**Q66** Har du hatt kontakt med følgende hjelpeinstanser etter hendelsen?

|                                                                                                                 |                            |                            |
|-----------------------------------------------------------------------------------------------------------------|----------------------------|----------------------------|
|                                                                                                                 | Ja                         | Nei                        |
| • Tok noen fra kriseteamet eller andre ansatte fra kommunen/bydelen kontakt med deg rett etter hendelsen? ..... | <input type="checkbox"/> 1 | <input type="checkbox"/> 2 |
| • Har du hatt en kontaktperson i kommunen/bydelen? .....                                                        | <input type="checkbox"/>   | <input type="checkbox"/>   |

**Q67**

| <b>Q67.A</b>                                                                                        | <b>Q67.B</b>                   | <b>Q67.C</b>                                             |                          |                          |                          |
|-----------------------------------------------------------------------------------------------------|--------------------------------|----------------------------------------------------------|--------------------------|--------------------------|--------------------------|
| Etter hendelsene på Utøya 22. juli, har du fått hjelp fra ...?                                      | Hvis ja, ca hvor mange ganger? | I hvilken grad har denne hjelpen vært til nytte for deg? | Ja                       | Nei                      | Noter antall             |
|                                                                                                     |                                |                                                          | Ikke i det hele tatt     | I noen grad              | I stor grad              |
| • Fastlegen din .....                                                                               | <input type="checkbox"/> 1     | <input type="checkbox"/> 2                               | <input type="checkbox"/> | <input type="checkbox"/> | <input type="checkbox"/> |
| • Andre hjelpepersoner i kommunen, for eksempel helsesøster, PPT, kommunepsykolog eller andre ..... | <input type="checkbox"/>       | <input type="checkbox"/>                                 | <input type="checkbox"/> | <input type="checkbox"/> | <input type="checkbox"/> |
| • Psykolog eller psykiater i spesialisthelsetjenesten, for eksempel BUP, DPS eller andre .....      | <input type="checkbox"/>       | <input type="checkbox"/>                                 | <input type="checkbox"/> | <input type="checkbox"/> | <input type="checkbox"/> |
| • Sjelesørger (prest, imam og lignende)                                                             | <input type="checkbox"/>       | <input type="checkbox"/>                                 | <input type="checkbox"/> | <input type="checkbox"/> | <input type="checkbox"/> |

**Q68** Har noen ansatte eller tillitsvalgte fra AUF vært i kontakt med deg som del av oppfølgingen etter hendelsene på Utøya 22. juli?

Ja .....  1  
 Nei .....  2

HVIS JA

**Q69** I hvilken grad har du opplevd kontakten med AUF som støttende?

Ikke i det hele tatt .....  1  
 I noen grad .....  2  
 I stor grad .....  3

**Q70** Hvor nyttig har kontakten med AUF vært for deg etter terrorangrepet 22. juli?

- Ikke i det hele tatt .....  1  
 I noen grad .....  2  
 I stor grad .....  3

**Q71** Dersom du var innlagt i sykehus:

|                                                                                                            | Ikke i det hele tatt       | I liten grad               | Til dels                   | I høy grad                 | I meget høy grad           |   |
|------------------------------------------------------------------------------------------------------------|----------------------------|----------------------------|----------------------------|----------------------------|----------------------------|---|
| • I hvilken grad er du tilfreds med mottaket og behandlingen du fikk på sykehuset du var innlagt på? ..... | <input type="checkbox"/> 1 | <input type="checkbox"/> 2 | <input type="checkbox"/> 3 | <input type="checkbox"/> 4 | <input type="checkbox"/> 5 | 1 |
| • I hvilken grad er du tilfreds med måten du ble tatt hånd om av legene på sykehuset? .....                | <input type="checkbox"/>   | <input type="checkbox"/>   | <input type="checkbox"/>   | <input type="checkbox"/>   | <input type="checkbox"/>   | 2 |
| • I hvilken grad er du tilfreds med måten du ble tatt hånd om av sykepleierne på sykehuset? .....          | <input type="checkbox"/>   | <input type="checkbox"/>   | <input type="checkbox"/>   | <input type="checkbox"/>   | <input type="checkbox"/>   | 3 |
| • I hvilken grad er du tilfreds med informasjonen du fikk om tilstanden din? .....                         | <input type="checkbox"/>   | <input type="checkbox"/>   | <input type="checkbox"/>   | <input type="checkbox"/>   | <input type="checkbox"/>   | 4 |
| • I hvilken grad opplevde du eventuell mottatt psykologisk hjelp på sykehuset som nyttig? .....            | <input type="checkbox"/>   | <input type="checkbox"/>   | <input type="checkbox"/>   | <input type="checkbox"/>   | <input type="checkbox"/>   | 5 |
| • I hvilken grad fikk du nok forklaring på hvilken oppfølging du skulle få etter utskrivning? .....        | <input type="checkbox"/>   | <input type="checkbox"/>   | <input type="checkbox"/>   | <input type="checkbox"/>   | <input type="checkbox"/>   | 6 |

**Hvordan har du det nå**

**Q72** Hvor fornøyd er du med livet sånn i alminnelighet på en skala fra 1 til 10, der 1 er svært misfornøyd og 10 er svært fornøyd.?

|                  | 01                       | 02                       | 03                       | 04                       | 05                       | 06                       | 07                       | 08                       | 09                       | 10                       |               |   |
|------------------|--------------------------|--------------------------|--------------------------|--------------------------|--------------------------|--------------------------|--------------------------|--------------------------|--------------------------|--------------------------|---------------|---|
| Svært misfornøyd | <input type="checkbox"/> | <input type="checkbox"/> | <input type="checkbox"/> | <input type="checkbox"/> | <input type="checkbox"/> | <input type="checkbox"/> | <input type="checkbox"/> | <input type="checkbox"/> | <input type="checkbox"/> | <input type="checkbox"/> | Svært fornøyd | 1 |

**Q73** **Fungering**

|                                                                                                        | Ikke i det hele tatt       | Litt av tiden              | Noe av tiden               | Mye av tiden               | Svært mye av tiden         |   |
|--------------------------------------------------------------------------------------------------------|----------------------------|----------------------------|----------------------------|----------------------------|----------------------------|---|
| Synes du det er vanskelig å få gjort det du skal? .....                                                | <input type="checkbox"/> 0 | <input type="checkbox"/> 1 | <input type="checkbox"/> 2 | <input type="checkbox"/> 3 | <input type="checkbox"/> 4 | 1 |
| Er det vanskeligere å komme overens med og/eller være sammen med familie/ venner? .....                | <input type="checkbox"/>   | <input type="checkbox"/>   | <input type="checkbox"/>   | <input type="checkbox"/>   | <input type="checkbox"/>   | 2 |
| Er du mye mindre interessert i, eller får ikke gjort, de tingene du pleide å gjøre før 22. juli? ..... | <input type="checkbox"/>   | <input type="checkbox"/>   | <input type="checkbox"/>   | <input type="checkbox"/>   | <input type="checkbox"/>   | 3 |

## Holdninger, tillit og trygghet

**Q74** Nå skal jeg stille deg noen spørsmål om sikkerhet, overvåking og åpenhet i samfunnet. Hvor enig eller uenig er du i følgende påstander:

Helt enig – delvis enig – verken eller – delvis uenig – helt uenig

|                                                                                                             | Helt enig<br>1           | Delvis enig<br>2         | Verken eller<br>3        | Delvis uenig<br>4        | Helt uenig<br>5          |   |
|-------------------------------------------------------------------------------------------------------------|--------------------------|--------------------------|--------------------------|--------------------------|--------------------------|---|
| • Norsk politi bør begynne å bære våpen .....                                                               | <input type="checkbox"/> | <input type="checkbox"/> | <input type="checkbox"/> | <input type="checkbox"/> | <input type="checkbox"/> | 1 |
| • I Norge kan man møte sentrale politikere på gaten uten synlig sikkerhet. Slik bør det fortsatt være. .... | <input type="checkbox"/> | <input type="checkbox"/> | <input type="checkbox"/> | <input type="checkbox"/> | <input type="checkbox"/> | 2 |
| • Sikkerhetstiltakene i Norge bør styrkes, selv om det kan gi ulemper for meg selv. ....                    | <input type="checkbox"/> | <input type="checkbox"/> | <input type="checkbox"/> | <input type="checkbox"/> | <input type="checkbox"/> | 3 |

**Q75** Hvor bekymret er du for nye terrorangrep i Norge i nær framtid? Oppgi svaret på en skala fra 0 til 10 der 0 er ikke bekymret i det hele tatt og 10 er svært bekymret?

| Ikke bekymret i det hele tatt |                          |                          |                          |                          |                          |                          |                          |                          |                          |                          | Svært bekymret |
|-------------------------------|--------------------------|--------------------------|--------------------------|--------------------------|--------------------------|--------------------------|--------------------------|--------------------------|--------------------------|--------------------------|----------------|
| 00                            | 01                       | 02                       | 03                       | 04                       | 05                       | 06                       | 07                       | 08                       | 09                       | 10                       |                |
| ...                           | <input type="checkbox"/> | <input type="checkbox"/> | <input type="checkbox"/> | <input type="checkbox"/> | <input type="checkbox"/> | <input type="checkbox"/> | <input type="checkbox"/> | <input type="checkbox"/> | <input type="checkbox"/> | <input type="checkbox"/> |                |

**Q76** På en skala fra 0 til 10 der 0 står for at du ikke har noen tillit i det hele tatt, mens 10 står for at du har full tillit.

|                                                   |                          |                          |                          |                          |                          |                          |                          |                          |                          |                          | Ingen tillit i det hele tatt | Full tillit |
|---------------------------------------------------|--------------------------|--------------------------|--------------------------|--------------------------|--------------------------|--------------------------|--------------------------|--------------------------|--------------------------|--------------------------|------------------------------|-------------|
| 00                                                | 01                       | 02                       | 03                       | 04                       | 05                       | 06                       | 07                       | 08                       | 09                       | 10                       |                              |             |
| • Hvor stor tillit har du til rettsvesenet? ..... | <input type="checkbox"/> | <input type="checkbox"/> | <input type="checkbox"/> | <input type="checkbox"/> | <input type="checkbox"/> | <input type="checkbox"/> | <input type="checkbox"/> | <input type="checkbox"/> | <input type="checkbox"/> | <input type="checkbox"/> |                              |             |
| • Hvor stor tillit har du til politiet? .....     | <input type="checkbox"/> | <input type="checkbox"/> | <input type="checkbox"/> | <input type="checkbox"/> | <input type="checkbox"/> | <input type="checkbox"/> | <input type="checkbox"/> | <input type="checkbox"/> | <input type="checkbox"/> | <input type="checkbox"/> |                              |             |

## Bruk av sosiale medier

**Q77** Har du brukt sosiale medier (for eksempel Facebook, Twitter, Blogg etc.) i tilknytning til terroren 22. juli?

Ja .....  1  
Nei .....  2

HVIS JA

**Q78** Hva har du brukt sosiale medier til?

Kryss av på de svaralternativene som passer best

- Lest om andres tanker eller meninger om hendelsene .....  1.
- Delt egne tanker eller meninger om hendelsene .....  2.
- Søkt støtte fra andre .....  3.
- Gitt støtte til andre .....  4.

## Demografi:

### Q79 Kjønn

Kvinne/jente .....  1  
Mann/gutt .....  2

### Q80 Antall søsken (inklusive halvsøsken og stesøsken)

Noter antall

### Q81 Antall foreldre som er i live (biologiske og adoptivforeldre)

0 .....  0  
1 .....  1  
2 .....  2

### Q82 Er foreldrene dine skilt?

Ja .....  1  
Nei .....  2

### Q83 Antall steforeldre som du bor med

0 .....  0  
1 .....  1  
2 .....  2

### Q84 Bor du sammen med noen?

Nei .....  1  
Ja .....  2

### Q85 Hvis ja, hvem?

Flere svar mulig

Ektefelle/samboer .....  1,  
En eller begge foreldre .....  2,  
Andre voksne .....  3,  
Ett eller flere barn (under 18 år) .....  4.

### Q86 Har du flyttet til annen kommune etter 22. juli?

Ja .....  1  
Nei .....  2

### Q87 I hvilket land er du født : Norge?

Ja .....  1  
Nei .....  2

#### HVIS FØDT I ANNET LAND

### Q88 Hvilket land ble du født i?

Noter \_\_\_\_\_

### Q89 I hvilket land er moren din født: Norge?

Ja .....  1  
Nei .....  2

#### HVIS MOREN DIN BLE FØDT I ANNET LAND

### Q90 Hvilket land ble hun født i?

Noter \_\_\_\_\_

### Q91 I hvilket land er faren din født: Norge?

Ja .....  1  
Nei .....  2

#### HVIS FAREN DIN BLE FØDT I ANNET LAND

### Q92 Hvilket land ble han født i?

Noter \_\_\_\_\_

## Utdanning/arbeid/økonomi

**Q93** Hva er din høyeste fullførte utdanning/skolegang?

Universitet/høyskole mer enn 4 år .....  1  
Universitet /høyskole inntil 4 år .....  2  
Studieforberedende opplæring / allmennfaglig studieretning på videregående skole .....  3  
Yrkesfaglig opplæring / yrkesfaglig studieretning på videregående skole .....  4  
Grunnskole .....  5  
Ingen fullført utdannelse .....  6

**Q94** Er du i arbeid (hel- eller deltid, minst 50%)?

Ja .....  1  
Nei .....  2

**Q95** Er du student eller skoleelev (hel- eller deltid, minst 50%)?

Ja .....  1  
Nei .....  2

HVIS JA PÅ SPM. **q94**

**Q96** Har du vært borte fra jobb på grunn av fysiske eller psykiske plager i løpet av de siste 3 månedene?

Nei .....  1  
Ja .....  2

## Tilhørighet i AUF:

**Q101** Var du medlem i AUF 22. juli 2011?

Ja .....  1  
Nei .....  2

HVIS JA PÅ SPM. **q95**

**Q97** Har du vært borte fra skole på grunn av fysiske eller psykiske plager i løpet av de siste 3 månedene?

Nei .....  1  
Ja .....  2

HVIS JA PÅ SPM. **q96** ELLER **q97**

**Q98** Omtrent hvor mange dager med sykefravær har du hatt til sammen i denne perioden ?

5 dager eller mindre .....  1  
6-10 dager .....  2  
11-20 dager .....  3  
Mer enn 20 dager .....  4

TIL DEM SOM BOR MED FORELDRE

**Q99** Hvor god råd synes du at familien din har i forhold til folk flest?

Mye bedre råd .....  1  
Noe bedre råd .....  2  
Omtrent som folk flest .....  3  
Noe dårligere råd .....  4  
Mye dårligere råd .....  5

TIL DEM SOM IKKE BOR MED FORELDRE

**Q100** Hvor god råd synes du at du har i forhold til folk flest?

Mye bedre råd .....  1  
Noe bedre råd .....  2  
Omtrent som folk flest .....  3  
Noe dårligere råd .....  4  
Mye dårligere råd .....  5

HVIS JA

**Q102** Hvor lenge har du vært medlem?

Antall år

**Q103** Var du tillitsvalgt?

Ja .....  1  
Nei .....  2

**Religion:**

**Q104** Er du medlem i statskirken eller annet kristent trossamfunn?

Ja .....  1  
Nei .....  2

**Q105** Er du medlem av islamsk trossamfunn?

Ja .....  1  
Nei .....  2

**Q106** Er du medlem av noen andre trossamfunn?

Ja .....  1  
Nei .....  2

**Q107** I hvilken grad er religion viktig for deg personlig?

I svært stor grad .....  1  
I liten grad .....  2  
Ikke i det hele tatt .....  3

**Når du har fylt inn spørsmålene ovenfor, vil intervjuer avslutte med å diskutere hjelpebehov med deg.**

## Udekket hjelpebehov?

Spørsmålene nedenfor fylles ut av intervjuer i samråd med deg.

**Q108**

Hvis informanten svarte litt eller mer plaget på spørsmål om «Tanker om å ta ditt liv» ( **svare fra Q39.A.9** ) foretas en suicidalitetsvurdering hvor blant annet følgende momenter bør dekkes:

|                                                             | Ja<br>1                  | Nei<br>2                 |   |
|-------------------------------------------------------------|--------------------------|--------------------------|---|
| Har du noen gang skadet deg selv? .....                     | <input type="checkbox"/> | <input type="checkbox"/> | 1 |
| Har du skadet deg selv i løpet av de siste 14 dagene? ..... | <input type="checkbox"/> | <input type="checkbox"/> | 2 |
| Har du konkrete tanker om å ta ditt eget liv? .....         | <input type="checkbox"/> | <input type="checkbox"/> | 3 |
| Har du planer om å ta ditt eget liv? .....                  | <input type="checkbox"/> | <input type="checkbox"/> | 4 |

FORETA EN KLINISK VURDERING AV EVENTUELT AKUTT HJELPEBEHOV.

FOR ALLE

**Q109**

Får du dekket de behovene du mener du har for hjelp etter det som skjedde på Utøya 22.juli (for eksempel fra psykolog, lege, sykepleier, sosial arbeider, eller andre profesjonelle)?

Ja .....  1  
Nei .....  2

**Q110**

Til intervjuer: Er det kommet fram noe i intervjuet som tilsier at du bør drøfte hjelpebehov med informanten?

Ja .....  1  
Nei .....  2

**Q111**

Hvis ja, hva ble konklusjonen på drøftelsen? (beskriv)

Noter \_\_\_\_\_

Noter \_\_\_\_\_

Noter \_\_\_\_\_

**Q112** Hvordan er dette fulgt opp av intervjueren?

Dette kan for eksempel være at kontaktperson i kommunen er kontaktet og henviser informanten til psykisk helsevern, eller at man har kommet fram til at det ikke er behov for ytterligere hjelp.

Noter \_\_\_\_\_

Noter \_\_\_\_\_

Noter \_\_\_\_\_

**Q113** Ny kontakt

Når intervjuet avsluttes, spør intervjueren om det er i orden at vi kontakter igjen om ca 6 måneder for nytt intervju.

Ja .....  1  
Nei .....  2

**Avslutning av intervjuet**

(Til intervjueren: Gi ungdommen god tid til å avslutte intervjuet eller kommentere. Kanskje er det ting de ønsker du skulle ha spurt om eller annet de ønsker å formidle tilbake til oss. Dersom ungdommen trenger tid til å avslutte, vis respekt for det. Hjelp til med eventuelle emosjonelle reaksjoner som de trenger hjelp til. Husk å takke for at de har deltatt og minn dem på at all kontaktinformasjon står i informasjonsskrivet. )
