# Supplementary material for: Health service utilization after terrorism: a longitudinal study of survivors of the 2011 Utøya attack in Norway
Source: Springer Nature journal article supplement (doi:10.1186/s12913-015-0811-6), 2015-04-14
Supplement: MOESM2 [file 9757206]

|              |                |
|--------------|----------------|
| Prosjekt     | <b>1076481</b> |
| Skjemanummer |                |

## Informasjon til intervjuer

Husk at samtykkeerklæringen skal undertegnes før intervjuet starter. Vi er opptatt av hvordan du har det, og det kommer vi til å snakke mye om i intervjuet.

### Husk å fylle ut kontaktinformasjon samtidig med samtykkeerklæringen.

STILL ALLE SPØRSMÅL – selv om du synes du har spurt om dette før. Hvis informanten ikke forstår spørsmålet, gjenta det. Deretter kan du prøve å forklare hva det betyr, men unngå å utdype med din egen tolkning av meningsinnholdet i spørsmålet. Alt som står i grå bokser er info til intervjuer. Ikke les dette høyt.

### Intervjumanualen består av 4 deler:

**Del I** består av flere åpne spørsmål eller narrativ, hvor vi ønsker fyldige beskrivelser fra informanten. Hvis informanten har vanskeligheter med å svare eller svarer kort på spørsmålene, hjelp informanten videre ved å spørre oppfølgingsspørsmål i tråd med instruksjonene under hvert enkelt spørsmål. «Åpningsspørsmålet» er ment som et innledende spørsmål for å møte informantene der de er nå. Spørsmålet om "Rettssaken" går til alle informantene. Spørsmålene om «Skole», «Sosiale medier» og «Identitet og tilhørighet» skal bare besvares av et delutvalg. Følg instruksjonene underveis. Bruk ca. 5-10 minutter per tema, ca. 30 minutter til sammen på Del I.

**Del II** består av strukturerte spørsmål som alle skal svare på, og som intervjuer leser opp.

**Del III** skal informanten fylle ut selv med assistanse av intervjuer. Her kommer noen tema på nytt (noen av temaene fra Del I). Alle skal svare på disse og følge instruksjonene underveis.

**Del IV** er en avslutning av intervjuet hvor intervjuer skal vurdere hvorvidt det er et udekket hjelpebehov som må følges opp av intervjuer.

## Introduksjon

I fjor snakket vi med mange av dere som var på Utøya 22. juli, og vi snakket med mange av foreldrene deres. Sist vi snakket sammen var vi opptatt av hva dere opplevde, og hvordan dere hadde det da. Vi er fremdeles opptatt av hvordan dere har det, og det kommer vi til å snakke mye om i intervjuet. Grunnen til dette er at det vil kunne gi oss viktig kunnskap om hvilke belastninger slike hendelser har i et lengre tidsperspektiv.

Det du forteller meg vil ikke bli fortalt videre til dine foreldre, på samme måte som du ikke får vite hva dine foreldre forteller oss. Hvis du sier noe som gjør at jeg blir bekymret for deg, må vi drøfte hva vi kan gjøre for å hjelpe deg videre. Dersom du er under 18 år kan det hende jeg må snakke med foreldrene dine om dette, men da vil jeg si ifra til deg først.

Si ifra til meg hvis det er noe du ikke forstår, eller hvis det er noe du synes det er vanskelig å svare på. Hvis du vil ha en pause så er det helt i orden. Dersom det er spørsmål du ikke ønsker å svare på, kan du si fra underveis. Du trenger ikke å forklare hvorfor du ikke ønsker å svare på spørsmål.

Jeg har med diktafon, slik at vi etter intervjuet kan skrive ned det du forteller oss. Er det i orden for deg?

**SLÅ PÅ DIKTAFONEN**

**Instruksjon til intervjuer:**

Skjemaet avleses maskinelt. Pass derfor på at du setter kryss innenfor den avmerkede boksen. Skriv tydelige tall der du blir bedt om å skrive tall.

**ID** NB! Skriv inn id.nr. og les det høyt opp på begynnelsen av intervjuet.

ID .....

**ID** Dagens dato

Eks. 1. september 2012 noteres slik: 010912

Noter .....

## Del I Åpne spørsmål

### Åpningsspørsmål

Nå er det gått over ett år siden hendelsene 22. juli i fjor, og det er mye som har skjedd i løpet av denne tiden. Fortell meg hvordan dette siste året har vært for deg.

### Rettsaken etter 22. juli 2011

Rettsaken etter 22.juli 2011 er over etter å ha vart i 10 uker, og dommen er avsagt. Tenk deg tilbake til tiden da rettsaken pågikk. Fortell meg hvordan du opplevde rettsaken.

(Hvis du ikke fulgte med i rettsaken, ønsker jeg å få vite bakgrunnen for dette.)

**Instruksjon til intervjuer:**

Vi ønsker både å få frem om- og hvordan ungdommen har engasjert seg i rettsaken, og hvordan den følelsesmessig har virket inn. Og om det er deler av rettsaken som har gjort spesielle inntrykk: eksempelvis gjerningsmannens forklaring, obduksjonsrapportene, vitneforklaringer.

## Skole

**S1** Gikk du i 2. eller 3. klasse på videregående skole hele eller deler av skoleåret 2011/12?

Ja .....  1

Nei ..... ( ⇒ S2 )  2

Fortell hvordan forrige skoleår var for deg, på godt og vondt. Jeg tenker spesielt med bakgrunn i dine opplevelser fra 22. juli 2011.

**NØKKELTEMA:**

Faglig fungering, trivsel, sosial/emosjonell støtte og faglige tilrettelegginger på skolen.

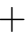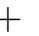

## Sosiale medier

|                                                                                                      |                                                                                                                              |                            |
|------------------------------------------------------------------------------------------------------|------------------------------------------------------------------------------------------------------------------------------|----------------------------|
| <b>S2</b>                                                                                            | Er du født i 1992 eller tidligere, og har du brukt sosiale medier i tilknytning til hendelsene 22. juli 2011 og tiden etter? |                            |
| Ja                                                                                                   | .....                                                                                                                        | <input type="checkbox"/> 1 |
| Nei                                                                                                  | ..... ( ⇒ S3 )                                                                                                               | <input type="checkbox"/> 2 |
| <b>Instruksjon til intervjuer:</b>                                                                   |                                                                                                                              |                            |
| Deltageren må tilfredsstillе begge kriterier for å gå videre til intervju om bruk av sosiale medier. |                                                                                                                              |                            |

I de følgende spørsmålene er jeg interessert i all form for kommunikasjon du har hatt gjennom sosiale medier som kan tilknyttes det du opplevde.

Fortell meg om sist gang du brukte sosiale medier i tilknytning til det du opplevde 22. juli 2011 og tiden etter.

|                                                                                                                                               |
|-----------------------------------------------------------------------------------------------------------------------------------------------|
| <b>NØKKELTEMA:</b>                                                                                                                            |
| Hva brukte du sosiale medier til? Hvem kommuniserte du med? Hva kommuniserte du? Hvordan opplevde du det? Hva slags sosiale medier brukte du? |

Kan du gi meg noen eksempler på positive erfaringer med å bruke sosiale medier i tilknytning til det du opplevde 22. juli 2011 og tiden etter?

|                                                                 |
|-----------------------------------------------------------------|
| <b>NØKKELTEMA</b>                                               |
| Hva var det du opplevde som positivt? Hvem kommuniserte du med? |

Kan du gi meg noen eksempler på negative erfaringer med å bruke sosiale medier i tilknytning til det du opplevde 22. juli 2011 og tiden etter?

|                                                                 |
|-----------------------------------------------------------------|
| <b>NØKKELTEMA:</b>                                              |
| Hva var det du opplevde som negativt? Hvem kommuniserte du med? |

## Tilhørighet

Nå kommer et spørsmål til de som var på Utøya som har minoritetsbakgrunn.

|           |                                                                                                              |                            |
|-----------|--------------------------------------------------------------------------------------------------------------|----------------------------|
| <b>S3</b> | Er du selv, din mor og/eller din far født i et øst-europeisk, asiatisk, afrikansk eller sør-amerikansk land? |                            |
| Ja        | .....                                                                                                        | <input type="checkbox"/> 1 |
| Nei       | ..... ( ⇒ Q1 )                                                                                               | <input type="checkbox"/> 2 |

Har din opplevelse av tilhørighet til det norske samfunnet endret seg etter 22. juli 2011, og i så fall på hvilken måte?

|                                                                                                                                                  |
|--------------------------------------------------------------------------------------------------------------------------------------------------|
| <b>NØKKELTEMA:</b>                                                                                                                               |
| Eksklusjons-/inklusionsmekanismer i det norske samfunnet, hvordan oppleves det å tilhøre en etnisk minoritetsgruppe i Norge etter 22. juli 2011. |

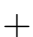

# Del II Lukkede spørsmål

## Posttraumatiske stressreaksjoner

Man kan få ulike reaksjoner på dramatiske hendelser. Nå kommer jeg til å lese opp noen påstander om mulige reaksjoner etter terrorangrepet på Utøya 22. juli 2011. For hver påstand vil jeg spørre hvor ofte du har opplevd å ha det slik DEN SISTE MÅNEDEN.

Her er et skjema som er til hjelp når du skal svare på hvor ofte du har opplevd problemet den siste måneden.

### Instruksjon til intervjuer:

Ta frem frekvensarket og legg på bordet mellom dere. Gå gjennom de ulike alternativene før dere starter på listen.

### Q1 Hvor mye av tiden DEN SISTE MÅNEDEN

|                                                                                                                                                           | Aldri                    | Sjelden                  | Noen ganger              | Ofte                     | Nesten alltid            |    |
|-----------------------------------------------------------------------------------------------------------------------------------------------------------|--------------------------|--------------------------|--------------------------|--------------------------|--------------------------|----|
|                                                                                                                                                           | 1                        | 2                        | 3                        | 4                        | 5                        |    |
| • Jeg er på vakt for fare eller ting jeg er redd for. ....                                                                                                | <input type="checkbox"/> | <input type="checkbox"/> | <input type="checkbox"/> | <input type="checkbox"/> | <input type="checkbox"/> | 1  |
| • Når noe minner meg om det som skjedde på Utøya 22. juli 2011, blir jeg veldig ute av meg, redd eller trist. ....                                        | <input type="checkbox"/> | <input type="checkbox"/> | <input type="checkbox"/> | <input type="checkbox"/> | <input type="checkbox"/> | 2  |
| • Jeg får skremmende tanker, ser for meg bilder eller hører lyder fra det som skjedde på Utøya 22. juli 2011, selv om jeg ikke vil det. ....              | <input type="checkbox"/> | <input type="checkbox"/> | <input type="checkbox"/> | <input type="checkbox"/> | <input type="checkbox"/> | 3  |
| • Jeg føler meg sur, sint eller rasende. ....                                                                                                             | <input type="checkbox"/> | <input type="checkbox"/> | <input type="checkbox"/> | <input type="checkbox"/> | <input type="checkbox"/> | 4  |
| • Jeg drømmer om det som skjedde på Utøya 22. juli 2011 eller har mareritt om andre ting. ....                                                            | <input type="checkbox"/> | <input type="checkbox"/> | <input type="checkbox"/> | <input type="checkbox"/> | <input type="checkbox"/> | 5  |
| • Jeg føler at jeg er tilbake til da terroren skjedde på Utøya 22. juli 2011, og opplever det om igjen. ....                                              | <input type="checkbox"/> | <input type="checkbox"/> | <input type="checkbox"/> | <input type="checkbox"/> | <input type="checkbox"/> | 6  |
| • Jeg har lyst til å være alene og ikke sammen med venner. ....                                                                                           | <input type="checkbox"/> | <input type="checkbox"/> | <input type="checkbox"/> | <input type="checkbox"/> | <input type="checkbox"/> | 7  |
| • Jeg føler meg alene inni meg og føler ikke nærhet til andre mennesker. ....                                                                             | <input type="checkbox"/> | <input type="checkbox"/> | <input type="checkbox"/> | <input type="checkbox"/> | <input type="checkbox"/> | 8  |
| • Jeg forsøker å ikke snakke om det som skjedde på Utøya 22. juli 2011, tenke på det eller ha følelser rundt det. ....                                    | <input type="checkbox"/> | <input type="checkbox"/> | <input type="checkbox"/> | <input type="checkbox"/> | <input type="checkbox"/> | 9  |
| • Jeg har problemer med å føle glede eller kjærlighet. ....                                                                                               | <input type="checkbox"/> | <input type="checkbox"/> | <input type="checkbox"/> | <input type="checkbox"/> | <input type="checkbox"/> | 10 |
| • Jeg har problemer med å føle tristhet eller sinne. ....                                                                                                 | <input type="checkbox"/> | <input type="checkbox"/> | <input type="checkbox"/> | <input type="checkbox"/> | <input type="checkbox"/> | 11 |
| • Jeg blir lett urolig eller skvetter lett, for eksempel når jeg hører høye lyder eller når noe overrasker meg. ....                                      | <input type="checkbox"/> | <input type="checkbox"/> | <input type="checkbox"/> | <input type="checkbox"/> | <input type="checkbox"/> | 12 |
| • Jeg har problemer med å få sove eller jeg våkner ofte om natten. ...                                                                                    | <input type="checkbox"/> | <input type="checkbox"/> | <input type="checkbox"/> | <input type="checkbox"/> | <input type="checkbox"/> | 13 |
| • Jeg bebreider meg selv for noe av det som skjedde på Utøya 22. juli 2011. ....                                                                          | <input type="checkbox"/> | <input type="checkbox"/> | <input type="checkbox"/> | <input type="checkbox"/> | <input type="checkbox"/> | 14 |
| • Jeg har problemer med å huske viktige ting fra det som skjedde på Utøya 22.juli. ....                                                                   | <input type="checkbox"/> | <input type="checkbox"/> | <input type="checkbox"/> | <input type="checkbox"/> | <input type="checkbox"/> | 15 |
| • Jeg har problemer med å konsentrere meg eller være oppmerksom. ....                                                                                     | <input type="checkbox"/> | <input type="checkbox"/> | <input type="checkbox"/> | <input type="checkbox"/> | <input type="checkbox"/> | 16 |
| • Jeg forsøker å holde meg unna folk, steder eller ting som minner meg om det som skjedde på Utøya 22.juli. ....                                          | <input type="checkbox"/> | <input type="checkbox"/> | <input type="checkbox"/> | <input type="checkbox"/> | <input type="checkbox"/> | 17 |
| • Når noe minner meg om det som skjedde på Utøya 22. juli 2011, får jeg sterke følelser i kroppen, for eksempel hjertebank, hodepine eller mageknip. .... | <input type="checkbox"/> | <input type="checkbox"/> | <input type="checkbox"/> | <input type="checkbox"/> | <input type="checkbox"/> | 18 |
| • Jeg tror ikke at jeg kommer til å leve lenge. ....                                                                                                      | <input type="checkbox"/> | <input type="checkbox"/> | <input type="checkbox"/> | <input type="checkbox"/> | <input type="checkbox"/> | 19 |
| • Jeg krangler eller slåss mye. ....                                                                                                                      | <input type="checkbox"/> | <input type="checkbox"/> | <input type="checkbox"/> | <input type="checkbox"/> | <input type="checkbox"/> | 20 |
| • Jeg er negativ eller pessimistisk når jeg tenker på fremtiden. ....                                                                                     | <input type="checkbox"/> | <input type="checkbox"/> | <input type="checkbox"/> | <input type="checkbox"/> | <input type="checkbox"/> | 21 |

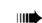

### Hvor mye av tiden DEN SISTE MÅNEDEN

|                                                                                                                                                                                                         | Aldri                    | Sjelden                  | Noen ganger              | Ofte                     | Nesten alltid            |    |
|---------------------------------------------------------------------------------------------------------------------------------------------------------------------------------------------------------|--------------------------|--------------------------|--------------------------|--------------------------|--------------------------|----|
| • Jeg er redd for at noe lignende som det som skjedde på Utøya 22. juli 2011 skal skje igjen. ....                                                                                                      | <input type="checkbox"/> | <input type="checkbox"/> | <input type="checkbox"/> | <input type="checkbox"/> | <input type="checkbox"/> | 22 |
| • Jeg er sint på noen andre for at de ikke gjorde mer for å forhindre det som skjedde på Utøya 22. juli 2011, eller for at de ikke har gjort nok etterpå (gjelder ikke sinne mot gjerningsmannen). .... | <input type="checkbox"/> | <input type="checkbox"/> | <input type="checkbox"/> | <input type="checkbox"/> | <input type="checkbox"/> | 23 |
| • Jeg tenker at andre vonde ting vil skje med meg i fremtiden. ....                                                                                                                                     | <input type="checkbox"/> | <input type="checkbox"/> | <input type="checkbox"/> | <input type="checkbox"/> | <input type="checkbox"/> | 24 |
| • Jeg gjør ting som skader eller kan skade meg selv eller andre. (For eksempel å kjøre for fort, bruke narkotika, drikke veldig mye, skade meg selv eller gjøre andre farlige ting). ....               | <input type="checkbox"/> | <input type="checkbox"/> | <input type="checkbox"/> | <input type="checkbox"/> | <input type="checkbox"/> | 25 |
| • Jeg klandrer meg selv for at jeg ikke er blitt fortere bra. ....                                                                                                                                      | <input type="checkbox"/> | <input type="checkbox"/> | <input type="checkbox"/> | <input type="checkbox"/> | <input type="checkbox"/> | 26 |
| • Jeg skammer meg over noe av det som skjedde på Utøya 22. juli 2011. ....                                                                                                                              | <input type="checkbox"/> | <input type="checkbox"/> | <input type="checkbox"/> | <input type="checkbox"/> | <input type="checkbox"/> | 27 |
| • Det som hendte var så motbydelig og frastøtende at jeg føler meg dårlig, blir kvalm eller føler avsky når jeg tenker på det. ....                                                                     | <input type="checkbox"/> | <input type="checkbox"/> | <input type="checkbox"/> | <input type="checkbox"/> | <input type="checkbox"/> | 28 |
| • Jeg tenker at verden er utrygg, og at jeg ikke er godt nok beskyttet. .                                                                                                                               | <input type="checkbox"/> | <input type="checkbox"/> | <input type="checkbox"/> | <input type="checkbox"/> | <input type="checkbox"/> | 29 |
| • Jeg har sterke følelser om hevn ....                                                                                                                                                                  | <input type="checkbox"/> | <input type="checkbox"/> | <input type="checkbox"/> | <input type="checkbox"/> | <input type="checkbox"/> | 30 |
| • Jeg klandrer meg selv for at jeg lot det som skjedde på Utøya 22. juli 2011 endre meg så mye. ....                                                                                                    | <input type="checkbox"/> | <input type="checkbox"/> | <input type="checkbox"/> | <input type="checkbox"/> | <input type="checkbox"/> | 31 |
| • Jeg føler meg veldig redd. ....                                                                                                                                                                       | <input type="checkbox"/> | <input type="checkbox"/> | <input type="checkbox"/> | <input type="checkbox"/> | <input type="checkbox"/> | 32 |
| • Jeg tenker negativt om meg selv, for eksempel at jeg er et dårlig menneske, eller et menneske som ikke stoler på andre. ....                                                                          | <input type="checkbox"/> | <input type="checkbox"/> | <input type="checkbox"/> | <input type="checkbox"/> | <input type="checkbox"/> | 33 |

## Om å bli minnet på hendelsen

**Q2** Det er vanlig at ulike situasjoner, eller ting omkring oss, kan minne oss om fæle ting som har skjedd. Noen ganger kan dette vekke vonde følelser og/eller kroppslige reaksjoner som kan ligne på (minne om) det du kjente under terrorangrepet. Dette kaller vi påminnere. Slike påminnere kan være bestemte steder du går, mennesker eller ting du ser, lyder du hører, ting du ser på TV, eller følelser.

Jeg skal nå lese opp en liste med mulige påminnere. Jeg vil at du skal fortelle meg hvor ofte, i løpet av DEN SISTE MÅNEDEN, disse tingene har minnet deg om det som skjedde på Utøya og gjort deg oppskaket eller stresset.

|                                                                                                                                                                      | 1<br>Aldri               | 2<br>Sjelden             | 3<br>Noen<br>ganger      | 4<br>Ofte                | 5<br>Veldig<br>ofte      |   |
|----------------------------------------------------------------------------------------------------------------------------------------------------------------------|--------------------------|--------------------------|--------------------------|--------------------------|--------------------------|---|
| <b>Type påminner</b>                                                                                                                                                 |                          |                          |                          |                          |                          |   |
| • <b>Lyder</b><br>(Skudd, skrik, skarpe smell, fyrverkeri, alarmer, sirener, helikopter, etc.) .....                                                                 | <input type="checkbox"/> | <input type="checkbox"/> | <input type="checkbox"/> | <input type="checkbox"/> | <input type="checkbox"/> | 1 |
| • <b>Synsopplevelser</b><br>(Bilder, avisoppslag, uniformer, politi, våpen, Facebook profiler/oppdateringer, etc.) .....                                             | <input type="checkbox"/> | <input type="checkbox"/> | <input type="checkbox"/> | <input type="checkbox"/> | <input type="checkbox"/> | 2 |
| • <b>Lukt</b><br>(Kruttlukt, blodlukt, sykehuslukt, parfyme, lukt av skog eller stein, etc.) .....                                                                   | <input type="checkbox"/> | <input type="checkbox"/> | <input type="checkbox"/> | <input type="checkbox"/> | <input type="checkbox"/> | 3 |
| • <b>Berøring</b><br>(Kontakt med vann, kroppskontakt, etc.) .....                                                                                                   | <input type="checkbox"/> | <input type="checkbox"/> | <input type="checkbox"/> | <input type="checkbox"/> | <input type="checkbox"/> | 4 |
| • <b>Følelser</b><br>(Trist, redd, stresset, tomhet, frykt, etc.) .....                                                                                              | <input type="checkbox"/> | <input type="checkbox"/> | <input type="checkbox"/> | <input type="checkbox"/> | <input type="checkbox"/> | 5 |
| • <b>Kroppslige reaksjoner</b><br>(Stramme muskler, hjertebank, pustevansker, etc.) .....                                                                            | <input type="checkbox"/> | <input type="checkbox"/> | <input type="checkbox"/> | <input type="checkbox"/> | <input type="checkbox"/> | 6 |
| • <b>Situasjonsbetinget</b><br>Løping, menneskemengder, steder, bygninger/telt, AUF, naturomgivelser (som øyer, vann, skog, regn), sommer, datoer, ettårsdagen ..... | <input type="checkbox"/> | <input type="checkbox"/> | <input type="checkbox"/> | <input type="checkbox"/> | <input type="checkbox"/> | 7 |

**Q3** Andre påminnere (beskriv):

Noter \_\_\_\_\_

\_\_\_\_\_

Noter \_\_\_\_\_

\_\_\_\_\_

Noter \_\_\_\_\_

\_\_\_\_\_

**Q4** Av alle disse påminnerne, hvilken synes du er den verste (den mest plagsomme)?

Noter \_\_\_\_\_

\_\_\_\_\_

## Om å oppleve vanskelige følelser

**Q5** Nå kommer noen spørsmål om tanker og opplevelser man kan ha etter å ha opplevd dramatiske hendelser. Har du opplevd noe av dette på noe tidspunkt siden 22. juli 2011?

Sett ett kryss i hver linje

|                                                                                                                              | Nei                           | Ja, litt                      | Ja, mye                       |   |
|------------------------------------------------------------------------------------------------------------------------------|-------------------------------|-------------------------------|-------------------------------|---|
| • Har du bekymret deg over hva andre mennesker tenker om deg etter det som skjedde på Utøya 22. juli 2011? .....             | 0<br><input type="checkbox"/> | 1<br><input type="checkbox"/> | 2<br><input type="checkbox"/> | 1 |
| • Har du forsøkt å skjule noe som du gjorde, eller ikke gjorde, 22. juli 2011? .....                                         | <input type="checkbox"/>      | <input type="checkbox"/>      | <input type="checkbox"/>      | 2 |
| • Har du opplevd at andre har trukket seg vekk fra deg eller familien din etter det som skjedde på Utøya 22. juli 2011. .... | <input type="checkbox"/>      | <input type="checkbox"/>      | <input type="checkbox"/>      | 3 |
| • Har du opplevd at andre har klandret deg for noe som hendte på Utøya 22. juli 2011? .....                                  | <input type="checkbox"/>      | <input type="checkbox"/>      | <input type="checkbox"/>      | 4 |
| • Har du noen gang klandret deg selv for at du overlevde mens andre ble drept? .....                                         | <input type="checkbox"/>      | <input type="checkbox"/>      | <input type="checkbox"/>      | 5 |

## Depresjon og angst

**Q6** Jeg vil nå spørre deg om noen plager man kan ha uten at de nødvendigvis er relatert til det man har opplevd. Angi i hvilken grad du har vært plaget av hvert enkelt problem i løpet av DE SISTE 14 DAGENE. Sett ett kryss for hver linje.

|                                                     | Ikke plaget              | Litt plaget              | Ganske mye plaget        | Veldig mye plaget        |   |
|-----------------------------------------------------|--------------------------|--------------------------|--------------------------|--------------------------|---|
|                                                     | 1                        | 2                        | 3                        | 4                        |   |
| • Stadig redd eller engstelig .....                 | <input type="checkbox"/> | <input type="checkbox"/> | <input type="checkbox"/> | <input type="checkbox"/> | 1 |
| • Nervøsitet, indre uro .....                       | <input type="checkbox"/> | <input type="checkbox"/> | <input type="checkbox"/> | <input type="checkbox"/> | 2 |
| • Følelse av håpløshet med tanke på fremtiden ..... | <input type="checkbox"/> | <input type="checkbox"/> | <input type="checkbox"/> | <input type="checkbox"/> | 3 |
| • Nedtrykt, tungsindig .....                        | <input type="checkbox"/> | <input type="checkbox"/> | <input type="checkbox"/> | <input type="checkbox"/> | 4 |
| • Mye bekymret eller urolig .....                   | <input type="checkbox"/> | <input type="checkbox"/> | <input type="checkbox"/> | <input type="checkbox"/> | 5 |
| • Følelse av at alt er et slit .....                | <input type="checkbox"/> | <input type="checkbox"/> | <input type="checkbox"/> | <input type="checkbox"/> | 6 |
| • Følelse av å være anspent, oppjaget .....         | <input type="checkbox"/> | <input type="checkbox"/> | <input type="checkbox"/> | <input type="checkbox"/> | 7 |
| • Plutselig frykt uten grunn .....                  | <input type="checkbox"/> | <input type="checkbox"/> | <input type="checkbox"/> | <input type="checkbox"/> | 8 |
| • Tanker om å ta ditt liv .....                     | <input type="checkbox"/> | <input type="checkbox"/> | <input type="checkbox"/> | <input type="checkbox"/> | 9 |

### INSTRUKSJON TIL INTERVJUER:

DERSOM UNGDOMMEN SVARER POSITIVT PÅ DET SISTE SPØRSMÅLET, SKAL DET TAS OPP PÅ SLUTTEN AV INTERVJUET.

## Dissosiasjon

**Q7** Har du opplevd eller følt noe av det følgende i løpet av DEN SISTE MÅNEDEN (når du ikke har vært påvirket av rus)?

|                                                                                                                                                                                                                             | Aldri                         | Sjelden                       | Noen ganger                   | Ofte                          | Nesten alltid                 |   |
|-----------------------------------------------------------------------------------------------------------------------------------------------------------------------------------------------------------------------------|-------------------------------|-------------------------------|-------------------------------|-------------------------------|-------------------------------|---|
| • Har du noen ganger sterke følelser eller tanker som virker som om de ikke er dine, eller følelse av at kroppen din ikke tilhører deg, som om du står utenfor deg selv, for eksempel som om du ser deg selv på film? ..... | 0<br><input type="checkbox"/> | 1<br><input type="checkbox"/> | 2<br><input type="checkbox"/> | 3<br><input type="checkbox"/> | 4<br><input type="checkbox"/> | 1 |
| • Er det ting som har skjedd deg som du selv ikke kan huske, men som har blitt fortalt deg av andre? .....                                                                                                                  | <input type="checkbox"/>      | <input type="checkbox"/>      | <input type="checkbox"/>      | <input type="checkbox"/>      | <input type="checkbox"/>      | 2 |
| • Har du opplevd at tiden har gått uten at du er sikker på hva du har gjort? Eller at du kan være et sted uten å huske hvordan du kom dit?                                                                                  | <input type="checkbox"/>      | <input type="checkbox"/>      | <input type="checkbox"/>      | <input type="checkbox"/>      | <input type="checkbox"/>      | 3 |
| • Har du noen gang vært forvirret med hensyn til hvem du er eller følt deg som du er en eller flere andre personer? .....                                                                                                   | <input type="checkbox"/>      | <input type="checkbox"/>      | <input type="checkbox"/>      | <input type="checkbox"/>      | <input type="checkbox"/>      | 4 |
| • Har det hendt at du plutselig har mistet følelsen i kroppen, mistet kraften i ben og armer, fått kramper, mistet evnen til å snakke, mistet synet eller hørselen eller plutselig ikke klart å svelge? .....               | <input type="checkbox"/>      | <input type="checkbox"/>      | <input type="checkbox"/>      | <input type="checkbox"/>      | <input type="checkbox"/>      | 5 |

## Skader

**Q8** Ble du fysisk skadet og hadde behov for medisinsk hjelp under terrorangrepet 22. juli 2011?

Ja .....  1  
 Nei ..... ( ⇒ Q11 )  2

**Q9** Har du fysiske skader fra terrorangrepet som hemmer deg i det daglige? (for eksempel i aktiviteter/ fritidsaktiviteter/ skolefungering/ daglige rutiner?)

Ja .....  1  
 Nei .....  2

**Q10** Hvor plaget er du av skaden(e) nå?

Ikke i det hele tatt .....  1  
 I liten grad .....  2  
 Noe .....  3  
 I stor grad .....  4  
 I veldig stor grad .....  5



## Somatiske helseplager

**Q11** Jeg skal nå lese opp en liste over kroppslige plager man noen ganger kan ha. Hvor mye har du vært plaget av dette i løpet av DE SISTE 2 UKENE?

|                                                                                               | Ikke plaget              | Litt plaget              | Ganske mye plaget        | Veldig mye plaget        |   |
|-----------------------------------------------------------------------------------------------|--------------------------|--------------------------|--------------------------|--------------------------|---|
|                                                                                               | 1                        | 2                        | 3                        | 4                        |   |
| • Vondt i magen (mageknip) .....                                                              | <input type="checkbox"/> | <input type="checkbox"/> | <input type="checkbox"/> | <input type="checkbox"/> | 1 |
| • Vondt i hodet .....                                                                         | <input type="checkbox"/> | <input type="checkbox"/> | <input type="checkbox"/> | <input type="checkbox"/> | 2 |
| • Vondt i korsryggen .....                                                                    | <input type="checkbox"/> | <input type="checkbox"/> | <input type="checkbox"/> | <input type="checkbox"/> | 3 |
| • Vondt i armer eller bein .....                                                              | <input type="checkbox"/> | <input type="checkbox"/> | <input type="checkbox"/> | <input type="checkbox"/> | 4 |
| • Følelse av å skulle besvime eller svimmelhet .....                                          | <input type="checkbox"/> | <input type="checkbox"/> | <input type="checkbox"/> | <input type="checkbox"/> | 5 |
| • Hjertet slår for fort (selv når du ikke trener) .....                                       | <input type="checkbox"/> | <input type="checkbox"/> | <input type="checkbox"/> | <input type="checkbox"/> | 6 |
| • Kvalme eller mageproblem (følelse av å ville kaste opp, eller av at magen er i ulage) ..... | <input type="checkbox"/> | <input type="checkbox"/> | <input type="checkbox"/> | <input type="checkbox"/> | 7 |
| • Kraftløshet (å føle seg svak) i deler av kroppen .....                                      | <input type="checkbox"/> | <input type="checkbox"/> | <input type="checkbox"/> | <input type="checkbox"/> | 8 |

**Q12** Nå vil jeg spørre deg litt mer om hodepine. Hadde du tilbakevendende hodepine i løpet av de siste 3 månedene før 22. juli 2011? Da tenker jeg på hodepine som ikke skyldes forkjølelse eller annen sykdom.

Ja .....  1  
 Nei .....  2

**Q13** Har du hatt tilbakevendende hodepine i løpet av DE SISTE 3 MND? Da tenker jeg på hodepine som ikke skyldes forkjølelse eller annen sykdom.

Ja .....  1  
 Nei ..... ( ⇒ Q15 )  2

**Q14** Jeg leser nå opp to beskrivelser av hodepineplager. Du forteller meg om en, begge eller ingen av beskrivelsene passer for hodepineplager du har hatt i løpet av de 3 SISTE MÅNEDENE.

|                                                                                                                                                                                                                                                                                                                                                                                                                                         | Nei                      | Mindre enn en gang per mnd | 1-3 dager per mnd        | 1-4 dager per uke        | Mer enn 4 dager per uke  |   |
|-----------------------------------------------------------------------------------------------------------------------------------------------------------------------------------------------------------------------------------------------------------------------------------------------------------------------------------------------------------------------------------------------------------------------------------------|--------------------------|----------------------------|--------------------------|--------------------------|--------------------------|---|
|                                                                                                                                                                                                                                                                                                                                                                                                                                         | 1                        | 2                          | 3                        | 4                        | 5                        |   |
| • <b>A. Beskrivelse</b> Hodepinen kommer ofte som anfall, den er middels sterk eller sterk, og kan begynne på den ene siden. Hodepinen er bankende (dunkende) eller pulserende og jeg føler meg ofte kvalm eller må kaste opp. Når jeg har hodepine tåler jeg dårlig sterkt lys eller lyd, og vil helst ikke bevege hodet. ....                                                                                                         | <input type="checkbox"/> | <input type="checkbox"/>   | <input type="checkbox"/> | <input type="checkbox"/> | <input type="checkbox"/> | 1 |
| • <b>B. Beskrivelse</b> Hodepinen kommer ofte smygende, den er lett eller middels sterk og sitter ofte i hele hodet (eller nakken eller midt oppå hodet). Den føles som et press eller trykk (som et bånd rundt hodet), eller er verkende. Vanligvis er jeg ikke kvalm eller må kaste opp. Når jeg har denne hodepinen klarer jeg vanligvis å fortsette med for eksempel skolearbeid eller lekselesing og vanlig fysisk aktivitet. .... | <input type="checkbox"/> | <input type="checkbox"/>   | <input type="checkbox"/> | <input type="checkbox"/> | <input type="checkbox"/> | 2 |
| • <b>C.</b> Verken beskrivelse A eller B passer med mine hodepineplager. ...                                                                                                                                                                                                                                                                                                                                                            | <input type="checkbox"/> | <input type="checkbox"/>   | <input type="checkbox"/> | <input type="checkbox"/> | <input type="checkbox"/> | 3 |

## Sorg

### Q15 Mistet du en nær person (nær venn, kjæreste, familiemedlem) i terrorangrepet?

- Ja, nær venn .....  1,  
Ja, kjæreste .....  2,  
Ja, familiemedlem .....  3.

### Q16 Jeg vil nå stille deg noen spørsmål om hvordan det har vært for deg etter at han/hun døde.

- |                                                                                                                                                                                                                                                                                                                                        | Ikke i<br>det<br>hele<br>tatt | Noe                      | Mye                      |   |
|----------------------------------------------------------------------------------------------------------------------------------------------------------------------------------------------------------------------------------------------------------------------------------------------------------------------------------------|-------------------------------|--------------------------|--------------------------|---|
|                                                                                                                                                                                                                                                                                                                                        | 1                             | 2                        | 3                        |   |
| • Hvor vanskelig synes du nå det er å godta at han/hun er død? .....                                                                                                                                                                                                                                                                   | <input type="checkbox"/>      | <input type="checkbox"/> | <input type="checkbox"/> | 1 |
| • Hvor mye påvirker sorgen livet ditt nå? .....                                                                                                                                                                                                                                                                                        | <input type="checkbox"/>      | <input type="checkbox"/> | <input type="checkbox"/> | 2 |
| • Hvor mye er du plaget av bilder av eller tanker på (den som døde) når hun/han døde, eller av andre tanker omkring dødsfallet som virkelig plager deg? .....                                                                                                                                                                          | <input type="checkbox"/>      | <input type="checkbox"/> | <input type="checkbox"/> | 3 |
| • Er det ting du pleide å gjøre mens han/hun var i live som du ikke lenger er komfortabel med å gjøre, og som du unngår? Som for eksempel å gå steder dit du gikk sammen med henne/ham, eller gjøre ting som dere likte å gjøre sammen? Eller unngå å se på bilder av eller snakke om han/hun? Hvor mye unngår du disse tingene? ..... | <input type="checkbox"/>      | <input type="checkbox"/> | <input type="checkbox"/> | 4 |
| • Hvor mye føler du deg avskåret eller fjern fra andre mennesker etter at han/hun døde, også mennesker du pleide å være nær, som familie eller venner? .....                                                                                                                                                                           | <input type="checkbox"/>      | <input type="checkbox"/> | <input type="checkbox"/> | 5 |

## Alkohol og medikamenter

### Q17 Har du drukket alkohol i løpet av de siste 4 ukene?

- Ja .....  1  
Nei ..... ( ⇒ Q21 )  2

### Q18 Omtrent hvor mange ganger har du drukket alkohol i løpet av de siste 4 ukene?

- 1-2 ganger .....  1  
3-5 ganger .....  2  
6-9 ganger .....  3  
10-19 ganger .....  4  
Oftere .....  5

### Q19 Omtrent hvor mange ganger har du kjent deg tydelig beruset i løpet av de siste 4 ukene?

- Ingen ganger .....  1  
1-2 ganger .....  2  
3-5 ganger .....  3  
6-9 ganger .....  4  
10 ganger eller mer .....  5

**Q20** I løpet av de siste 4 ukene, hvor ofte har du brukt alkohol for å dempe angst, bli mindre deprimert eller for å få sove?

- Daglig .....  1  
 Hver uke, men ikke daglig .....  2  
 Sjeldnere enn hver uke .....  3  
 Ikke brukt siste 4 ukene .....  4

**Q21** I løpet av de siste 4 ukene, hvor ofte har du brukt følgende medisiner?

Sett et kryss på hver linje

|                                   | Daglig                   | Hver uke, men ikke daglig | Sjeldnere enn hver uke   | Ikke brukt siste 4 uker  |
|-----------------------------------|--------------------------|---------------------------|--------------------------|--------------------------|
|                                   | 1                        | 2                         | 3                        | 4                        |
| • Smertestillende medisiner ..... | <input type="checkbox"/> | <input type="checkbox"/>  | <input type="checkbox"/> | <input type="checkbox"/> |
| • Sovemedisin .....               | <input type="checkbox"/> | <input type="checkbox"/>  | <input type="checkbox"/> | <input type="checkbox"/> |
| • Beroligende medisin .....       | <input type="checkbox"/> | <input type="checkbox"/>  | <input type="checkbox"/> | <input type="checkbox"/> |
| • Medisin mot depresjon .....     | <input type="checkbox"/> | <input type="checkbox"/>  | <input type="checkbox"/> | <input type="checkbox"/> |

**Sosial støtte**

**Q22** Nå skal jeg lese opp noen påstander om omsorg og støtte. Jeg vil be deg om å vurdere disse påstandene i forhold til din egen situasjon nå.

|                                                                                                                  | Så mye jeg ønsker        | Nesten så mye jeg ønsker | Noe, men jeg ville ønsket mer | Mindre enn jeg ønsker    | Mye mindre enn jeg ønsker |
|------------------------------------------------------------------------------------------------------------------|--------------------------|--------------------------|-------------------------------|--------------------------|---------------------------|
|                                                                                                                  | 1                        | 2                        | 3                             | 4                        | 5                         |
| • Jeg har mennesker rundt meg som bryr seg om hva som skjer med meg .....                                        | <input type="checkbox"/> | <input type="checkbox"/> | <input type="checkbox"/>      | <input type="checkbox"/> | <input type="checkbox"/>  |
| • Jeg får kjærlighet og omsorg .....                                                                             | <input type="checkbox"/> | <input type="checkbox"/> | <input type="checkbox"/>      | <input type="checkbox"/> | <input type="checkbox"/>  |
| • Jeg har mulighet til å snakke med noen om arbeid-/skole-/studieproblemer mine. ....                            | <input type="checkbox"/> | <input type="checkbox"/> | <input type="checkbox"/>      | <input type="checkbox"/> | <input type="checkbox"/>  |
| • Jeg har mulighet til å snakke med noen jeg stoler på om mine personlige problemer eller familieproblemer ..... | <input type="checkbox"/> | <input type="checkbox"/> | <input type="checkbox"/>      | <input type="checkbox"/> | <input type="checkbox"/>  |
| • Jeg blir bedt med ut for å gjøre ting med andre mennesker. ....                                                | <input type="checkbox"/> | <input type="checkbox"/> | <input type="checkbox"/>      | <input type="checkbox"/> | <input type="checkbox"/>  |
| • Jeg får nyttige råd om viktige ting i livet. ....                                                              | <input type="checkbox"/> | <input type="checkbox"/> | <input type="checkbox"/>      | <input type="checkbox"/> | <input type="checkbox"/>  |
| • Jeg får hjelp når jeg ligger syk til sengs. ....                                                               | <input type="checkbox"/> | <input type="checkbox"/> | <input type="checkbox"/>      | <input type="checkbox"/> | <input type="checkbox"/>  |

**Q23** Fra tidligere katastrofer vet vi at det finnes ulike barrierer mot å søke sosial støtte. I hvor stor grad føler du at følgende utsagn passer for deg? Jeg lar være å søke hjelp og støtte, eller snakke med andre om hvordan jeg har det, fordi jeg tenker at

|                                                                        | Ikke i det hele tatt     | I liten grad             | Til dels                 | I stor grad              | I meget stor grad        |
|------------------------------------------------------------------------|--------------------------|--------------------------|--------------------------|--------------------------|--------------------------|
|                                                                        | 1                        | 2                        | 3                        | 4                        | 5                        |
| • De er lei av å høre om det .....                                     | <input type="checkbox"/> | <input type="checkbox"/> | <input type="checkbox"/> | <input type="checkbox"/> | <input type="checkbox"/> |
| • De har det vanskelig nok selv .....                                  | <input type="checkbox"/> | <input type="checkbox"/> | <input type="checkbox"/> | <input type="checkbox"/> | <input type="checkbox"/> |
| • De kan synes jeg er for opphengt i det som har skjedd .....          | <input type="checkbox"/> | <input type="checkbox"/> | <input type="checkbox"/> | <input type="checkbox"/> | <input type="checkbox"/> |
| • Jeg ikke skal bruke opp vennene mine .....                           | <input type="checkbox"/> | <input type="checkbox"/> | <input type="checkbox"/> | <input type="checkbox"/> | <input type="checkbox"/> |
| • De som ikke var på Utøya, ikke kan forstå meg .....                  | <input type="checkbox"/> | <input type="checkbox"/> | <input type="checkbox"/> | <input type="checkbox"/> | <input type="checkbox"/> |
| • Jeg føler meg sviktet av noen som jeg trodde ville støttet meg ..... | <input type="checkbox"/> | <input type="checkbox"/> | <input type="checkbox"/> | <input type="checkbox"/> | <input type="checkbox"/> |

## Instruksjon til intervjuer:

Her følger en del spørsmål deltageren kan fylle ut selv. Vær tilgjengelig for spørsmål deltageren har. Husk å gjøre vurdering av udekket hjelpebehov før du avslutter intervjuet.

## Del III Selvutfylling

### Hvordan har du det nå?

#### Q24 Hvor fornøyd er du med livet sånn i alminnelighet?

Sett et kryss på en skala fra 1 til 10, der 1 er svært misfornøyd og 10 er svært fornøyd.

Svært  
misfornøyd

Svært  
fornøyd

01  02  03  04  05  06  07  08  09  10

#### Q25 I hvor stor grad er du tilbake i vanlig funksjon på følgende områder?

Sett ett kryss i hver linje

|                                                      | Ikke i<br>det<br>hele<br>tatt | I liten<br>grad          | I noen<br>grad           | I stor<br>grad           | Helt<br>tilbake          |
|------------------------------------------------------|-------------------------------|--------------------------|--------------------------|--------------------------|--------------------------|
|                                                      | 1                             | 2                        | 3                        | 4                        | 5                        |
| • Skole/studier/arbeid .....                         | <input type="checkbox"/>      | <input type="checkbox"/> | <input type="checkbox"/> | <input type="checkbox"/> | <input type="checkbox"/> |
| • På fritiden .....                                  | <input type="checkbox"/>      | <input type="checkbox"/> | <input type="checkbox"/> | <input type="checkbox"/> | <input type="checkbox"/> |
| • Forhold til venner .....                           | <input type="checkbox"/>      | <input type="checkbox"/> | <input type="checkbox"/> | <input type="checkbox"/> | <input type="checkbox"/> |
| • Forhold til familien .....                         | <input type="checkbox"/>      | <input type="checkbox"/> | <input type="checkbox"/> | <input type="checkbox"/> | <input type="checkbox"/> |
| • Husarbeid (plikter hjemme, vaske klær, etc.) ..... | <input type="checkbox"/>      | <input type="checkbox"/> | <input type="checkbox"/> | <input type="checkbox"/> | <input type="checkbox"/> |

### Skole

Du skal svare på dette spørsmålet selv om du tidligere i intervjuet har fortalt om ditt forrige skoleår.

#### Q26 Gikk du på skole, eller studerte du, hele eller deler av skoleåret 2011/12?

Ja .....  1  
Nei ..... ( ⇒ Q33 )  2

#### Q27 Fullførte du hele forrige skole/studieår?

Ja .....  1  
Nei .....  2

#### Q28 Opplever du at dine skole/studieprestasjoner har endret seg etter 22. juli 2011?

Dårligere .....  1  
Uendret .....  2  
Bedre .....  3

#### Q29 Har din trivsel på skolen/studiestedet endret seg etter 22. juli 2011?

Dårligere .....  1  
Uendret .....  2  
Bedre .....  3

**Q30** Nå kommer noen spørsmål om dine vurderinger av behov for støtte og tilrettelegginger i forrige skoleår på bakgrunn av dine opplevelser fra 22. juli 2011.

Sett ett kryss i hver linje

|                                                                                                                                      | Ikke i det hele tatt          | I liten grad                  | Til dels                      | I høy grad                    | I meget høy grad              |
|--------------------------------------------------------------------------------------------------------------------------------------|-------------------------------|-------------------------------|-------------------------------|-------------------------------|-------------------------------|
| • Hadde du behov for ekstra praktiske tilrettelegginger som f.eks. utsettelse av innleveringer og tilpassede prøver/eksamener? ..... | 1<br><input type="checkbox"/> | 2<br><input type="checkbox"/> | 3<br><input type="checkbox"/> | 4<br><input type="checkbox"/> | 5<br><input type="checkbox"/> |
| • Hadde du behov for ekstra faglig støtte fra lærere? .....                                                                          | <input type="checkbox"/>      | <input type="checkbox"/>      | <input type="checkbox"/>      | <input type="checkbox"/>      | <input type="checkbox"/>      |
| • Hadde du behov for ekstra sosial- og følelsesmessig støtte på skolen? .....                                                        | <input type="checkbox"/>      | <input type="checkbox"/>      | <input type="checkbox"/>      | <input type="checkbox"/>      | <input type="checkbox"/>      |

**Q31** Mottok du ekstra støtte forrige skoleår?

Ja .....  1  
 Nei ..... ( ⇒ Q33 )  2

**Q32** Sett under ett, hvor fornøyd er du med støtten/tilretteleggingen skolen ga forrige skoleår?

Ikke i det hele tatt .....  1  
 I liten grad .....  2  
 Til dels .....  3  
 I høy grad .....  4  
 I meget høy grad .....  5

**Q33** Går du på skole eller universitet/høgskole nå?

Ja .....  1  
 Nei ..... ( ⇒ Q35 )  2

**Q34** Du vil nå få noen spørsmål om hvordan du synes det er å utføre skolearbeid/studiearbeid. Hvor lett synes du det er å:

Sett ett kryss i hver linje

|                                                                       | Ikke lett i det hele tatt     | Ikke særlig lett              | Ganske lett                   | Lett                          | Svært lett                    |
|-----------------------------------------------------------------------|-------------------------------|-------------------------------|-------------------------------|-------------------------------|-------------------------------|
| • Gjøre ferdig hjemmeoppgaver innen en tidsfrist? .....               | 1<br><input type="checkbox"/> | 2<br><input type="checkbox"/> | 3<br><input type="checkbox"/> | 4<br><input type="checkbox"/> | 5<br><input type="checkbox"/> |
| • Gjøre skolearbeid når det er andre interessante ting å gjøre? ..... | <input type="checkbox"/>      | <input type="checkbox"/>      | <input type="checkbox"/>      | <input type="checkbox"/>      | <input type="checkbox"/>      |
| • Konsentrere deg om skolefag? .....                                  | <input type="checkbox"/>      | <input type="checkbox"/>      | <input type="checkbox"/>      | <input type="checkbox"/>      | <input type="checkbox"/>      |
| • Ta notater i timen? .....                                           | <input type="checkbox"/>      | <input type="checkbox"/>      | <input type="checkbox"/>      | <input type="checkbox"/>      | <input type="checkbox"/>      |
| • Bruke biblioteket for å få informasjon til klasseoppgaver? .....    | <input type="checkbox"/>      | <input type="checkbox"/>      | <input type="checkbox"/>      | <input type="checkbox"/>      | <input type="checkbox"/>      |
| • Planlegge skolearbeidet ditt? .....                                 | <input type="checkbox"/>      | <input type="checkbox"/>      | <input type="checkbox"/>      | <input type="checkbox"/>      | <input type="checkbox"/>      |
| • Organisere skolearbeidet ditt? .....                                | <input type="checkbox"/>      | <input type="checkbox"/>      | <input type="checkbox"/>      | <input type="checkbox"/>      | <input type="checkbox"/>      |
| • Huske ting som blir sagt i klassen og som står i skolebøkene? ..... | <input type="checkbox"/>      | <input type="checkbox"/>      | <input type="checkbox"/>      | <input type="checkbox"/>      | <input type="checkbox"/>      |
| • Ordne deg en leseplass der du kan jobbe uten forstyrrelser? .....   | <input type="checkbox"/>      | <input type="checkbox"/>      | <input type="checkbox"/>      | <input type="checkbox"/>      | <input type="checkbox"/>      |
| • Motivere deg til å gjøre skolearbeid? .....                         | <input type="checkbox"/>      | <input type="checkbox"/>      | <input type="checkbox"/>      | <input type="checkbox"/>      | <input type="checkbox"/>      |
| • Delta i klassediskusjoner? .....                                    | <input type="checkbox"/>      | <input type="checkbox"/>      | <input type="checkbox"/>      | <input type="checkbox"/>      | <input type="checkbox"/>      |

## Politisk aktivitet

**Q35** Er du mer eller mindre politisk aktiv nå sammenlignet med før 22. juli 2011?

Mindre .....  1  
Uendret .....  2  
Mer .....  3

**Q36** Har du fått nytt tillitsverv etter 22. juli 2011?

Ja .....  1  
Nei .....  2

**Q37** Har du sluttet i tillitsverv etter 22. juli 2011?

Ja .....  1  
Nei .....  2

## Rettsaken

Du har tidligere i intervjuet fortalt om dine opplevelser knyttet til rettsaken etter 22. juli 2011. Her kommer noen spørsmål om hvor mye du har deltatt i rettsaken.

**Q38** Jeg har fulgt rettsaken i media

Ja .....  1  
Nei .....  2

**Q39** Hvis ja

Gjennomsnittlig ant. timer pr. dag (under rettsaken)

.....

**Q40**

**Q40.A**

Jeg har fulgt rettsaken:

**Q40.B**

Hvis ja, hvor mye:  
Noter ant. dager

|                                                            | Ja                            | Nei                           |                      |
|------------------------------------------------------------|-------------------------------|-------------------------------|----------------------|
| Fra en sal med videooverføring .....                       | 1<br><input type="checkbox"/> | 2<br><input type="checkbox"/> | <input type="text"/> |
| Fra hovedforhandlingssalen i Oslo tingrett (sal 250) ..... | <input type="checkbox"/>      | <input type="checkbox"/>      | <input type="text"/> |

**Q41** Jeg har vitnet i retten

Ja .....  1  
Nei .....  2

## Holdninger, tillit og trygghet

**Q42** Nå følger noen spørsmål om sikkerhet, overvåking og åpenhet i samfunnet. Hvor enig eller uenig er du i følgende påstander:

|                                                                                                             | Helt enig<br>1           | Delvis enig<br>2         | Verken eller<br>3        | Delvis uenig<br>4        | Helt uenig<br>5          |
|-------------------------------------------------------------------------------------------------------------|--------------------------|--------------------------|--------------------------|--------------------------|--------------------------|
| • Norsk politi bør begynne å bære våpen .....                                                               | <input type="checkbox"/> | <input type="checkbox"/> | <input type="checkbox"/> | <input type="checkbox"/> | <input type="checkbox"/> |
| • I Norge kan man møte sentrale politikere på gaten uten synlig sikkerhet. Slik bør det fortsatt være. .... | <input type="checkbox"/> | <input type="checkbox"/> | <input type="checkbox"/> | <input type="checkbox"/> | <input type="checkbox"/> |
| • Sikkerhetstiltakene i Norge bør styrkes, selv om det kan gi ulemper for meg selv. ....                    | <input type="checkbox"/> | <input type="checkbox"/> | <input type="checkbox"/> | <input type="checkbox"/> | <input type="checkbox"/> |

**Q43** Hvor bekymret er du for nye terrorangrep i Norge i nær framtid?

Oppgi svaret på en skala fra 0 til 10 der 0 er ikke bekymret i det hele tatt og 10 er svært bekymret?

Ikke  
bekymret  
i det hele  
tatt

Svært  
bekymret

|     |                          |                          |                          |                          |                          |                          |                          |                          |                          |                          |                          |
|-----|--------------------------|--------------------------|--------------------------|--------------------------|--------------------------|--------------------------|--------------------------|--------------------------|--------------------------|--------------------------|--------------------------|
| ... | 00                       | 01                       | 02                       | 03                       | 04                       | 05                       | 06                       | 07                       | 08                       | 09                       | 10                       |
|     | <input type="checkbox"/> | <input type="checkbox"/> | <input type="checkbox"/> | <input type="checkbox"/> | <input type="checkbox"/> | <input type="checkbox"/> | <input type="checkbox"/> | <input type="checkbox"/> | <input type="checkbox"/> | <input type="checkbox"/> | <input type="checkbox"/> |

**Q44** Hvor stor tillit har du til ...?

Oppgi på en skala fra 0 til 10 der 0 står for at du ikke har noen tillit i det hele tatt, mens 10 står for at du har full tillit.

Ingen  
tillit i  
det  
hele  
tatt

Full  
tillit

|                       |                          |                          |                          |                          |                          |                          |                          |                          |                          |                          |                          |
|-----------------------|--------------------------|--------------------------|--------------------------|--------------------------|--------------------------|--------------------------|--------------------------|--------------------------|--------------------------|--------------------------|--------------------------|
|                       | 00                       | 01                       | 02                       | 03                       | 04                       | 05                       | 06                       | 07                       | 08                       | 09                       | 10                       |
| • Rettsvesenet? ..... | <input type="checkbox"/> | <input type="checkbox"/> | <input type="checkbox"/> | <input type="checkbox"/> | <input type="checkbox"/> | <input type="checkbox"/> | <input type="checkbox"/> | <input type="checkbox"/> | <input type="checkbox"/> | <input type="checkbox"/> | <input type="checkbox"/> |
| • Politiet? .....     | <input type="checkbox"/> | <input type="checkbox"/> | <input type="checkbox"/> | <input type="checkbox"/> | <input type="checkbox"/> | <input type="checkbox"/> | <input type="checkbox"/> | <input type="checkbox"/> | <input type="checkbox"/> | <input type="checkbox"/> | <input type="checkbox"/> |
| • Helsevesenet? ..... | <input type="checkbox"/> | <input type="checkbox"/> | <input type="checkbox"/> | <input type="checkbox"/> | <input type="checkbox"/> | <input type="checkbox"/> | <input type="checkbox"/> | <input type="checkbox"/> | <input type="checkbox"/> | <input type="checkbox"/> | <input type="checkbox"/> |

## Mestringsstrategier

**Q45** Nå kommer noen spørsmål om ting man kan si eller gjøre for å hjelpe seg selv når noe er vanskelig. Tenk på hva du har pleid å gjøre, eller si til deg selv, i løpet av den siste måneden når du har hatt vansker eller problemer relatert til 22. juli 2011 (for eksempel, søvnvansker, konsentrasjon, sorg).

Sett ett kryss i hver linje

|                                                                             | Aldri                    | Noen ganger              | Ofte                     | Meste-<br>parten<br>av<br>tiden |    |
|-----------------------------------------------------------------------------|--------------------------|--------------------------|--------------------------|---------------------------------|----|
|                                                                             | 1                        | 2                        | 3                        | 4                               |    |
| • Jeg tenker på hva som er lurt å gjøre for å håndtere problemet. ....      | <input type="checkbox"/> | <input type="checkbox"/> | <input type="checkbox"/> | <input type="checkbox"/>        | 1  |
| • Jeg gjør noe for å løse problemet. ....                                   | <input type="checkbox"/> | <input type="checkbox"/> | <input type="checkbox"/> | <input type="checkbox"/>        | 2  |
| • Jeg tenker på hva jeg kan lære av det som har skjedd .....                | <input type="checkbox"/> | <input type="checkbox"/> | <input type="checkbox"/> | <input type="checkbox"/>        | 3  |
| • Jeg prøver å forstå hvordan 22. juli 2011 kunne skje. ....                | <input type="checkbox"/> | <input type="checkbox"/> | <input type="checkbox"/> | <input type="checkbox"/>        | 4  |
| • Jeg prøver å holde meg unna ting som gjør meg oppskaket. ....             | <input type="checkbox"/> | <input type="checkbox"/> | <input type="checkbox"/> | <input type="checkbox"/>        | 5  |
| • Jeg snakker med noen som kan hjelpe meg finne ut hva jeg skal gjøre. .... | <input type="checkbox"/> | <input type="checkbox"/> | <input type="checkbox"/> | <input type="checkbox"/>        | 6  |
| • Jeg snakker om mine følelser med noen som virkelig forstår .....          | <input type="checkbox"/> | <input type="checkbox"/> | <input type="checkbox"/> | <input type="checkbox"/>        | 7  |
| • Jeg skylder på andre .....                                                | <input type="checkbox"/> | <input type="checkbox"/> | <input type="checkbox"/> | <input type="checkbox"/>        | 8  |
| • Jeg søker trøst i religion. ....                                          | <input type="checkbox"/> | <input type="checkbox"/> | <input type="checkbox"/> | <input type="checkbox"/>        | 9  |
| • Jeg sier til meg selv at jeg kan håndtere dette problemet. ....           | <input type="checkbox"/> | <input type="checkbox"/> | <input type="checkbox"/> | <input type="checkbox"/>        | 10 |
| • Jeg sier til meg selv at ting ville bli bedre. ....                       | <input type="checkbox"/> | <input type="checkbox"/> | <input type="checkbox"/> | <input type="checkbox"/>        | 11 |
| • Jeg minner meg selv på at ting kunne vært verre. ....                     | <input type="checkbox"/> | <input type="checkbox"/> | <input type="checkbox"/> | <input type="checkbox"/>        | 12 |
| • Jeg prøver å la være å tenke på det .....                                 | <input type="checkbox"/> | <input type="checkbox"/> | <input type="checkbox"/> | <input type="checkbox"/>        | 13 |

**Q46** De forrige spørsmålene handlet om hva du gjør når du opplever vanskeligheter relatert til 22. juli 2011. Nå kommer noen påstander om hva du generelt pleier å gjøre når noe er vanskelig. Vennligst sett kryss ved de svarene som passer best for deg.

Sett ett kryss i hver linje

|                                                                                                                 | Helt<br>galt             | Nokså<br>galt            | Nokså<br>riktig          | Helt<br>riktig           |   |
|-----------------------------------------------------------------------------------------------------------------|--------------------------|--------------------------|--------------------------|--------------------------|---|
|                                                                                                                 | 1                        | 2                        | 3                        | 4                        |   |
| • Jeg klarer alltid å løse vanskelige problemer hvis jeg prøver hardt nok .....                                 | <input type="checkbox"/> | <input type="checkbox"/> | <input type="checkbox"/> | <input type="checkbox"/> | 1 |
| • Hvis noen motarbeider meg, så kan jeg finne måter og veier for å få det som jeg vil .....                     | <input type="checkbox"/> | <input type="checkbox"/> | <input type="checkbox"/> | <input type="checkbox"/> | 2 |
| • Hvis jeg har et problem og står helt fast, så finner jeg vanligvis en løsning ...                             | <input type="checkbox"/> | <input type="checkbox"/> | <input type="checkbox"/> | <input type="checkbox"/> | 3 |
| • Jeg føler meg trygg på at jeg vil kunne takle uventede hendelser på en effektiv måte .....                    | <input type="checkbox"/> | <input type="checkbox"/> | <input type="checkbox"/> | <input type="checkbox"/> | 4 |
| • Jeg beholder roen når jeg møter vanskeligheter, fordi jeg stoler på mine evner til å mestre/få til ting ..... | <input type="checkbox"/> | <input type="checkbox"/> | <input type="checkbox"/> | <input type="checkbox"/> | 5 |



## Livshendelser

**Q47** De neste spørsmålene dreier seg om andre hendelser i livet ditt. Har du noen gang opplevd noen av disse hendelsene?

Sett ett eller flere kryss for hver linje

|                                                                                                                                                                                                                                                                                                                             | Nei, aldri                  | Ja, før 22. juli 2011       | Ja, etter 22. juli 2011     |    |
|-----------------------------------------------------------------------------------------------------------------------------------------------------------------------------------------------------------------------------------------------------------------------------------------------------------------------------|-----------------------------|-----------------------------|-----------------------------|----|
| • At noen som står deg nær har vært livstruende syk? .....                                                                                                                                                                                                                                                                  | 1, <input type="checkbox"/> | 2, <input type="checkbox"/> | 3, <input type="checkbox"/> | 1  |
| • Plutselig (uventet) dødsfall hos noen som sto deg nær .....                                                                                                                                                                                                                                                               | <input type="checkbox"/>    | <input type="checkbox"/>    | <input type="checkbox"/>    | 2  |
| • En katastrofe (brann, ras, flodbølge, orkan e.l.)                                                                                                                                                                                                                                                                         | <input type="checkbox"/>    | <input type="checkbox"/>    | <input type="checkbox"/>    | 3  |
| • En alvorlig ulykke (f.eks. en svært alvorlig bilulykke) .....                                                                                                                                                                                                                                                             | <input type="checkbox"/>    | <input type="checkbox"/>    | <input type="checkbox"/>    | 4  |
| • Blitt utsatt for vold (banket opp eller skadet) ..                                                                                                                                                                                                                                                                        | <input type="checkbox"/>    | <input type="checkbox"/>    | <input type="checkbox"/>    | 5  |
| • Opplevd at noen som stod deg nær bli utsatt for vold (banket opp eller skadet) .....                                                                                                                                                                                                                                      | <input type="checkbox"/>    | <input type="checkbox"/>    | <input type="checkbox"/>    | 6  |
| • Blitt utsatt for ubehagelige seksuelle handlinger (seksuelle overgrep) .....                                                                                                                                                                                                                                              | <input type="checkbox"/>    | <input type="checkbox"/>    | <input type="checkbox"/>    | 7  |
| • Blitt truet eller fysisk/psykisk plaget av medelever/studenter på skolen/studiested i lengere tid .....                                                                                                                                                                                                                   | <input type="checkbox"/>    | <input type="checkbox"/>    | <input type="checkbox"/>    | 8  |
| • Fått smertefulle eller skremmende behandling på sykehus i forbindelse med sykdom eller skade .....                                                                                                                                                                                                                        | <input type="checkbox"/>    | <input type="checkbox"/>    | <input type="checkbox"/>    | 9  |
| • Opplevd noe annet som var veldig skremmende, farlig eller voldelig (f.eks. krig, terrorhandlinger, etc.) .....                                                                                                                                                                                                            | <input type="checkbox"/>    | <input type="checkbox"/>    | <input type="checkbox"/>    | 10 |
| • Smertefullt brudd med kjæreste/partner, foreldre eller familie .....                                                                                                                                                                                                                                                      | <input type="checkbox"/>    | <input type="checkbox"/>    | <input type="checkbox"/>    | 11 |
| • Når barn opplever omsorgssvikt, betyr det at nærstående voksne ikke tar seg så godt av dem som de burde. Det kan for eksempel bety at de ikke gir dem nok mat, tar dem med til legen når de er syke, ordner med rene og varme nok klær eller passer på at de har et trygt sted å være. Har du opplevd omsorgssvikt? ..... | <input type="checkbox"/>    | <input type="checkbox"/>    | <input type="checkbox"/>    | 12 |

## Erfaringer med media

**Q48** Har du blitt kontaktet av media om dine erfaringer fra det som skjedde på Utøya 22. juli 2011?

Ja .....  1  
 Nei ..... ( ⇒ Q51 )  2

**Q49**

Hvis ja

Hvordan har du opplevd disse henvendelsene fra media?

Veldig negativt .....  1  
 Negativt .....  2  
 Både positivt og negativt .....  3  
 Positivt .....  4  
 Veldig positivt .....  5

**Q50** Har du blitt *intervjuet* av media i forbindelse med det som skjedde på Utøya 22. juli 2011?

Ja .....  1  
 Nei .....  2

**Q51** Har du *skrevet innlegg* i media i forbindelse med det som skjedde på Utøya 22. juli 2011?

Ja .....  1  
 Nei .....  2

**Q52** Har du blitt intervjuet av media i forbindelse med *rettssaken* etter 22. juli 2011?

Ja .....  1  
 Nei .....  2

**Q53** Har du skrevet innlegg i media i forbindelse med *rettssaken* etter 22. juli 2011?

Ja .....  1  
 Nei .....  2

**Q54** Hvis ja på ett eller flere av spørsmålene **Q51 - Q53**

|                                                                                        | Ikke i<br>det<br>hele<br>tatt | I liten<br>grad               | Til dels                      | I stor<br>grad                | I meget<br>stor<br>grad       |   |
|----------------------------------------------------------------------------------------|-------------------------------|-------------------------------|-------------------------------|-------------------------------|-------------------------------|---|
| • I hvilken grad opplevde du det å være i media som en belastning for deg? .....       | 1<br><input type="checkbox"/> | 2<br><input type="checkbox"/> | 3<br><input type="checkbox"/> | 4<br><input type="checkbox"/> | 5<br><input type="checkbox"/> | 1 |
| • I hvilken grad opplevde du det å være i media som en positiv erfaring for deg? ..... | <input type="checkbox"/>      | <input type="checkbox"/>      | <input type="checkbox"/>      | <input type="checkbox"/>      | <input type="checkbox"/>      | 2 |
| • I hvilken grad har du angret på at du stilte opp i media? .....                      | <input type="checkbox"/>      | <input type="checkbox"/>      | <input type="checkbox"/>      | <input type="checkbox"/>      | <input type="checkbox"/>      | 3 |

## Sosiale medier

Du skal svare på disse spørsmålet selv om du tidligere i intervjuet har fortalt om din bruk av sosiale medier. Spørsmålene omhandler all form for kommunikasjon du har hatt gjennom sosiale medier som kan tilknyttes det du opplevde 22. juli og tiden etter.

**Q55** Når du tenker på **DEN SISTE MÅNEDE**, har du brukt sosiale medier i tilknytning til det du opplevde 22. juli 2011 og tiden etter?

Ja .....  1  
 Nei .....  2 ( ⇒ Q60 )

**Q56** I løpet av **DEN SISTE MÅNEDE**: Hvor ofte har du gjort følgende i tilknytning til det du opplevde 22. juli 2011 og tiden etter?

Sett ett kryss i hver linje

|                                                                                          | Aldri                         | 1-2<br>ganger<br>i måne-<br>den | 1-2<br>ganger<br>i uken       | Nesten<br>daglig              | Daglig                        |   |
|------------------------------------------------------------------------------------------|-------------------------------|---------------------------------|-------------------------------|-------------------------------|-------------------------------|---|
| • Skrevet/lagt ut/delt noe tilknyttet det du opplevde 22. juli 2011 og tiden etter ..... | 1<br><input type="checkbox"/> | 2<br><input type="checkbox"/>   | 3<br><input type="checkbox"/> | 4<br><input type="checkbox"/> | 5<br><input type="checkbox"/> | 1 |
| • Lest om andres tanker eller meninger om hendelsene og tiden etter ..                   | <input type="checkbox"/>      | <input type="checkbox"/>        | <input type="checkbox"/>      | <input type="checkbox"/>      | <input type="checkbox"/>      | 2 |
| • Delt egne tanker eller meninger om det du opplevde og tiden etter ..                   | <input type="checkbox"/>      | <input type="checkbox"/>        | <input type="checkbox"/>      | <input type="checkbox"/>      | <input type="checkbox"/>      | 3 |
| • Fått støtte fra andre .....                                                            | <input type="checkbox"/>      | <input type="checkbox"/>        | <input type="checkbox"/>      | <input type="checkbox"/>      | <input type="checkbox"/>      | 4 |
| • Gitt støtte til andre .....                                                            | <input type="checkbox"/>      | <input type="checkbox"/>        | <input type="checkbox"/>      | <input type="checkbox"/>      | <input type="checkbox"/>      | 5 |
| • Delt ting du synes det er vanskelig å dele på andre måter .....                        | <input type="checkbox"/>      | <input type="checkbox"/>        | <input type="checkbox"/>      | <input type="checkbox"/>      | <input type="checkbox"/>      | 6 |
| • Fortalt andre hvordan du har det .....                                                 | <input type="checkbox"/>      | <input type="checkbox"/>        | <input type="checkbox"/>      | <input type="checkbox"/>      | <input type="checkbox"/>      | 7 |

**Q57** I løpet av DEN SISTE MÅNEDE: Hvem kommuniserer du vanligvis med gjennom sosiale medier i tilknytning til det du opplevde 22. juli 2011 og tiden etter?

Sett ett kryss

Familie .....  01

Nære venner/kjæreste/partner (som ikke var på Utøya) .....  02

Andre som var på Utøya .....  03

Andre (beskriv): \_\_\_\_\_

**Q58** I løpet av DEN SISTE MÅNEDE: På hvilken måte har du vanligvis kommunisert gjennom sosiale medier i tilknytning til det du opplevde 22. juli 2011 og tiden etter?

Sett ett kryss

Gjennom åpen kommunikasjon (som hvem som helst kan se) .....  1

Gjennom lukket kommunikasjon (som kun utvalgte personer kan se) .....  2

Gjennom både lukket og åpen kommunikasjon .....  3

**Q59** I løpet av DEN SISTE MÅNEDE: Hvordan har din bruk av sosiale medier i tilknytning til det du opplevde 22. juli 2011 og tiden etter vært for deg?

Veldig negativt .....  1

Negativt .....  2

Både negativt og positivt .....  3

Positivt .....  4

Veldig positivt .....  5

**Q60** Til slutt, helt generelt (uavhengig av hendelsene 22. juli 2011). Hvor mye tid bruker du på sosiale medier en gjennomsnittlig dag?

0 – 30 minutter .....  1

31 - 60 minutter .....  2

Mer enn 60 minutter .....  3

## Relasjoner/familiesamspill

**Q61** Traumatiske hendelser kan påvirke familielivet. Nedenfor finner du en rekke utsagn som beskriver slike endringer.

Sett ett kryss i hver linje som indikerer hvor godt hvert utsagn stemmer for deg og din familie.

|                                                                                             | Stem-<br>mer<br>ikke<br>0 | Stem-<br>mer litt<br>1   | Stem-<br>mer<br>helt<br>2 |    |
|---------------------------------------------------------------------------------------------|---------------------------|--------------------------|---------------------------|----|
| • Nærmere hverandre enn før .....                                                           | <input type="checkbox"/>  | <input type="checkbox"/> | <input type="checkbox"/>  | 1  |
| • Mer irritable overfor hverandre .....                                                     | <input type="checkbox"/>  | <input type="checkbox"/> | <input type="checkbox"/>  | 2  |
| • Tilbringer mindre tid sammen .....                                                        | <input type="checkbox"/>  | <input type="checkbox"/> | <input type="checkbox"/>  | 3  |
| • Snakker oftere sammen om vanskelige ting .....                                            | <input type="checkbox"/>  | <input type="checkbox"/> | <input type="checkbox"/>  | 4  |
| • Trekker oss mer unna hverandre .....                                                      | <input type="checkbox"/>  | <input type="checkbox"/> | <input type="checkbox"/>  | 5  |
| • Unngår å diskutere problemer som virker oppskakende .....                                 | <input type="checkbox"/>  | <input type="checkbox"/> | <input type="checkbox"/>  | 6  |
| • Har mindre kontakt med nære venner og slektninger .....                                   | <input type="checkbox"/>  | <input type="checkbox"/> | <input type="checkbox"/>  | 7  |
| • Krangler mer med hverandre .....                                                          | <input type="checkbox"/>  | <input type="checkbox"/> | <input type="checkbox"/>  | 8  |
| • Finner det vanskelig å ha glede av felles aktiviteter .....                               | <input type="checkbox"/>  | <input type="checkbox"/> | <input type="checkbox"/>  | 9  |
| • Føler at vi har en tydeligere oppfatning om mål og verdier enn før .....                  | <input type="checkbox"/>  | <input type="checkbox"/> | <input type="checkbox"/>  | 10 |
| • Bekymrer oss for å legge belastninger på hverandre .....                                  | <input type="checkbox"/>  | <input type="checkbox"/> | <input type="checkbox"/>  | 11 |
| • Nå etter 22.juli er foreldrene mine mer bekymret for at jeg skal komme til skade .....    | <input type="checkbox"/>  | <input type="checkbox"/> | <input type="checkbox"/>  | 12 |
| • Foreldrene mine har et større behov for å vite hvor jeg er, enn de hadde før 22.juli. ... | <input type="checkbox"/>  | <input type="checkbox"/> | <input type="checkbox"/>  | 13 |

## Hendelsens betydning

**Q62** Tenk på hendelsene på Utøya 22. juli 2011 og besvar hvor enig eller uenig du er i følgende utsagn. Sett ett kryss i hver linje

|                                                                                                | Helt<br>enig<br>1        | Delvis<br>enig<br>2      | Verken<br>eller<br>3     | Delvis<br>uenig<br>4     | Helt<br>uenig<br>5       |   |
|------------------------------------------------------------------------------------------------|--------------------------|--------------------------|--------------------------|--------------------------|--------------------------|---|
| • Jeg føler at denne hendelsen har blitt en del av min identitet. ....                         | <input type="checkbox"/> | <input type="checkbox"/> | <input type="checkbox"/> | <input type="checkbox"/> | <input type="checkbox"/> | 1 |
| • Denne hendelsen har blitt et referansepunkt for hvordan jeg forstår meg selv og verden. .... | <input type="checkbox"/> | <input type="checkbox"/> | <input type="checkbox"/> | <input type="checkbox"/> | <input type="checkbox"/> | 2 |
| • Jeg føler at denne hendelsen har blitt en sentral del av min livshistorie. ....              | <input type="checkbox"/> | <input type="checkbox"/> | <input type="checkbox"/> | <input type="checkbox"/> | <input type="checkbox"/> | 3 |
| • Denne hendelsen har farget måten jeg tenker og føler rundt andre opplevelser. ....           | <input type="checkbox"/> | <input type="checkbox"/> | <input type="checkbox"/> | <input type="checkbox"/> | <input type="checkbox"/> | 4 |
| • Denne hendelsen har endret livet mitt for alltid. ....                                       | <input type="checkbox"/> | <input type="checkbox"/> | <input type="checkbox"/> | <input type="checkbox"/> | <input type="checkbox"/> | 5 |
| • Jeg tenker ofte på de virkningene denne hendelsen vil ha på min fremtid. ....                | <input type="checkbox"/> | <input type="checkbox"/> | <input type="checkbox"/> | <input type="checkbox"/> | <input type="checkbox"/> | 6 |
| • Denne hendelsen var et vendepunkt i livet mitt. ....                                         | <input type="checkbox"/> | <input type="checkbox"/> | <input type="checkbox"/> | <input type="checkbox"/> | <input type="checkbox"/> | 7 |

## Hvordan jeg har tenkt og følt siden det som hendte på Utøya

**Q63**

Vi ønsker å få vite hva slags tanker og følelser du har hatt etter det som hendte på Utøya. Nedenfor er en liste med utsagn. Vennligst les hvert utsagn nøye og fortell oss i hvilken grad du er **ENIG** eller **UENIG** med hvert utsagn ved å krysse av etter hver setning. Mennesker reagerer på skremmende hendelser på mange ulike måter. Det er ikke noen riktig eller gal måte å svare på disse utsagnene på.

Sett ett kryss i hver linje

|                                                                                                                      | 0<br>Veldig<br>uenig     | 1 Litt<br>uenig          | 2 Litt<br>enig           | 3<br>Veldig<br>enig      |    |
|----------------------------------------------------------------------------------------------------------------------|--------------------------|--------------------------|--------------------------|--------------------------|----|
|                                                                                                                      | 0                        | 1                        | 2                        | 3                        |    |
| • Hvem som helst kan såre eller skade meg .....                                                                      | <input type="checkbox"/> | <input type="checkbox"/> | <input type="checkbox"/> | <input type="checkbox"/> | 1  |
| • Alle svikter meg .....                                                                                             | <input type="checkbox"/> | <input type="checkbox"/> | <input type="checkbox"/> | <input type="checkbox"/> | 2  |
| • Jeg er en feiging .....                                                                                            | <input type="checkbox"/> | <input type="checkbox"/> | <input type="checkbox"/> | <input type="checkbox"/> | 3  |
| • Mine reaksjoner etter det som hendte på Utøya betyr at jeg har endret meg til det verre .....                      | <input type="checkbox"/> | <input type="checkbox"/> | <input type="checkbox"/> | <input type="checkbox"/> | 4  |
| • Jeg stoler ikke på mennesker .....                                                                                 | <input type="checkbox"/> | <input type="checkbox"/> | <input type="checkbox"/> | <input type="checkbox"/> | 5  |
| • Mine reaksjoner etter det som hendte på Utøya betyr at det er noe alvorlig galt med meg .....                      | <input type="checkbox"/> | <input type="checkbox"/> | <input type="checkbox"/> | <input type="checkbox"/> | 6  |
| • Jeg duger ikke .....                                                                                               | <input type="checkbox"/> | <input type="checkbox"/> | <input type="checkbox"/> | <input type="checkbox"/> | 7  |
| • At jeg ikke klarer å bli kvitt all min redsel betyr at jeg er mislykket .....                                      | <input type="checkbox"/> | <input type="checkbox"/> | <input type="checkbox"/> | <input type="checkbox"/> | 8  |
| • Jeg blir opprørt over småting .....                                                                                | <input type="checkbox"/> | <input type="checkbox"/> | <input type="checkbox"/> | <input type="checkbox"/> | 9  |
| • Når ting blir vanskelig klarer jeg ikke å håndtere det .....                                                       | <input type="checkbox"/> | <input type="checkbox"/> | <input type="checkbox"/> | <input type="checkbox"/> | 10 |
| • Jeg kan ikke hindre at negative ting skjer med meg .....                                                           | <input type="checkbox"/> | <input type="checkbox"/> | <input type="checkbox"/> | <input type="checkbox"/> | 11 |
| • Jeg må hele tiden være på vakt for fare .....                                                                      | <input type="checkbox"/> | <input type="checkbox"/> | <input type="checkbox"/> | <input type="checkbox"/> | 12 |
| • Mine reaksjoner etter det som hendte på Utøya betyr at jeg aldri vil komme over det som skjedde .....              | <input type="checkbox"/> | <input type="checkbox"/> | <input type="checkbox"/> | <input type="checkbox"/> | 13 |
| • Før var jeg en glad person, men nå er jeg alltid trist .....                                                       | <input type="checkbox"/> | <input type="checkbox"/> | <input type="checkbox"/> | <input type="checkbox"/> | 14 |
| • Det skjer alltid dårlige ting .....                                                                                | <input type="checkbox"/> | <input type="checkbox"/> | <input type="checkbox"/> | <input type="checkbox"/> | 15 |
| • Jeg kommer aldri til å klare å ha normale følelser igjen .....                                                     | <input type="checkbox"/> | <input type="checkbox"/> | <input type="checkbox"/> | <input type="checkbox"/> | 16 |
| • Jeg er redd for at jeg kan bli så sint at jeg kommer til å ødelegge noe eller skade noen .....                     | <input type="checkbox"/> | <input type="checkbox"/> | <input type="checkbox"/> | <input type="checkbox"/> | 17 |
| • Livet er ikke rettferdig .....                                                                                     | <input type="checkbox"/> | <input type="checkbox"/> | <input type="checkbox"/> | <input type="checkbox"/> | 18 |
| • Livet mitt har blitt ødelagt av det som hendte på Utøya .....                                                      | <input type="checkbox"/> | <input type="checkbox"/> | <input type="checkbox"/> | <input type="checkbox"/> | 19 |
| • Jeg føler at jeg er en annerledes person etter det som hendte på Utøya .....                                       | <input type="checkbox"/> | <input type="checkbox"/> | <input type="checkbox"/> | <input type="checkbox"/> | 20 |
| • Mine reaksjoner etter det som hendte på Utøya tyder på at jeg holder på å bli gal .....                            | <input type="checkbox"/> | <input type="checkbox"/> | <input type="checkbox"/> | <input type="checkbox"/> | 21 |
| • Det kan ikke skje noe bra for meg mer .....                                                                        | <input type="checkbox"/> | <input type="checkbox"/> | <input type="checkbox"/> | <input type="checkbox"/> | 22 |
| • Noe forferdelig kommer til å skje hvis jeg ikke prøver å kontrollere tankene mine om det som hendte på Utøya ..... | <input type="checkbox"/> | <input type="checkbox"/> | <input type="checkbox"/> | <input type="checkbox"/> | 23 |
| • Det som hendte på Utøya har forandret meg for alltid .....                                                         | <input type="checkbox"/> | <input type="checkbox"/> | <input type="checkbox"/> | <input type="checkbox"/> | 24 |
| • Jeg må være veldig forsiktig fordi noe fælt kan skje .....                                                         | <input type="checkbox"/> | <input type="checkbox"/> | <input type="checkbox"/> | <input type="checkbox"/> | 25 |

## Positive endringer

**Q64** Noen ganger kan mennesker fortelle om positive endringer etter større traumatiske opplevelser. For hvert av spørsmålene under, indiker i hvilken grad disse forandringene har skjedd i livet ditt som følge av terrorhandlingene 22. juli 2011.

For hvert av spørsmålene under, indiker i hvilken grad disse forandringene har skjedd i livet ditt som følge av terrorhandlingene 22. juli 2011.

- 1 = Jeg opplevde **ikke** denne forandringen som et resultat av terrorhandlingene.  
 2 = Jeg opplevde denne forandringen i **svært liten grad** som følge av terrorhandlingene  
 3 = Jeg opplevde denne forandringen i **liten grad** som følge av terrorhandlingene  
 4 = Jeg opplevde denne forandringen i **middels grad** som følge av terrorhandlingene  
 5 = Jeg opplevde denne forandringen i **stor grad** som følge av terrorhandlingene  
 6 = Jeg opplevde denne forandringen i **veldig stor grad** som følge av terrorhandlingene

Sett ett kryss i hver linje

|                                                                                      | 1                        | 2                        | 3                        | 4                        | 5                        | 6                        |    |
|--------------------------------------------------------------------------------------|--------------------------|--------------------------|--------------------------|--------------------------|--------------------------|--------------------------|----|
| • Jeg har endret mine prioriteringer når det gjelder hva som er viktig i livet ..... | <input type="checkbox"/> | <input type="checkbox"/> | <input type="checkbox"/> | <input type="checkbox"/> | <input type="checkbox"/> | <input type="checkbox"/> | 1  |
| • Jeg setter mer pris på livet mitt .....                                            | <input type="checkbox"/> | <input type="checkbox"/> | <input type="checkbox"/> | <input type="checkbox"/> | <input type="checkbox"/> | <input type="checkbox"/> | 2  |
| • Jeg har fått nye interesser .....                                                  | <input type="checkbox"/> | <input type="checkbox"/> | <input type="checkbox"/> | <input type="checkbox"/> | <input type="checkbox"/> | <input type="checkbox"/> | 3  |
| • Jeg har en sterkere følelse av at jeg kan stole på meg selv ..                     | <input type="checkbox"/> | <input type="checkbox"/> | <input type="checkbox"/> | <input type="checkbox"/> | <input type="checkbox"/> | <input type="checkbox"/> | 4  |
| • Jeg har fått en større forståelse for åndelige ting .....                          | <input type="checkbox"/> | <input type="checkbox"/> | <input type="checkbox"/> | <input type="checkbox"/> | <input type="checkbox"/> | <input type="checkbox"/> | 5  |
| • Jeg har oppdaget at jeg kan stole på andre i vanskelige perioder .....             | <input type="checkbox"/> | <input type="checkbox"/> | <input type="checkbox"/> | <input type="checkbox"/> | <input type="checkbox"/> | <input type="checkbox"/> | 6  |
| • Jeg har lagt om kursen i livet mitt .....                                          | <input type="checkbox"/> | <input type="checkbox"/> | <input type="checkbox"/> | <input type="checkbox"/> | <input type="checkbox"/> | <input type="checkbox"/> | 7  |
| • Jeg føler mer nærhet til andre mennesker .....                                     | <input type="checkbox"/> | <input type="checkbox"/> | <input type="checkbox"/> | <input type="checkbox"/> | <input type="checkbox"/> | <input type="checkbox"/> | 8  |
| • Jeg er mer villig til å uttrykke følelsene mine .....                              | <input type="checkbox"/> | <input type="checkbox"/> | <input type="checkbox"/> | <input type="checkbox"/> | <input type="checkbox"/> | <input type="checkbox"/> | 9  |
| • Jeg vet nå at jeg kan takle vanskeligheter .....                                   | <input type="checkbox"/> | <input type="checkbox"/> | <input type="checkbox"/> | <input type="checkbox"/> | <input type="checkbox"/> | <input type="checkbox"/> | 10 |
| • Jeg får mer ut av livet mitt nå .....                                              | <input type="checkbox"/> | <input type="checkbox"/> | <input type="checkbox"/> | <input type="checkbox"/> | <input type="checkbox"/> | <input type="checkbox"/> | 11 |
| • Jeg er i større grad i stand til å akseptere ting som de er ....                   | <input type="checkbox"/> | <input type="checkbox"/> | <input type="checkbox"/> | <input type="checkbox"/> | <input type="checkbox"/> | <input type="checkbox"/> | 12 |
| • Jeg setter mer pris på hver dag som går .....                                      | <input type="checkbox"/> | <input type="checkbox"/> | <input type="checkbox"/> | <input type="checkbox"/> | <input type="checkbox"/> | <input type="checkbox"/> | 13 |
| • Jeg har fått muligheter jeg ellers ikke ville fått .....                           | <input type="checkbox"/> | <input type="checkbox"/> | <input type="checkbox"/> | <input type="checkbox"/> | <input type="checkbox"/> | <input type="checkbox"/> | 14 |
| • Jeg har fått mer medfølelse for andre .....                                        | <input type="checkbox"/> | <input type="checkbox"/> | <input type="checkbox"/> | <input type="checkbox"/> | <input type="checkbox"/> | <input type="checkbox"/> | 15 |
| • Jeg bestreber meg i større grad på å ivareta mine nære relasjoner .....            | <input type="checkbox"/> | <input type="checkbox"/> | <input type="checkbox"/> | <input type="checkbox"/> | <input type="checkbox"/> | <input type="checkbox"/> | 16 |
| • Jeg er mer tilbøyelig til å forandre på ting som trenger å endres .....            | <input type="checkbox"/> | <input type="checkbox"/> | <input type="checkbox"/> | <input type="checkbox"/> | <input type="checkbox"/> | <input type="checkbox"/> | 17 |
| • Jeg har en sterkere religiøs tro .....                                             | <input type="checkbox"/> | <input type="checkbox"/> | <input type="checkbox"/> | <input type="checkbox"/> | <input type="checkbox"/> | <input type="checkbox"/> | 18 |
| • Jeg har oppdaget at jeg er sterkere enn jeg trodde jeg var ..                      | <input type="checkbox"/> | <input type="checkbox"/> | <input type="checkbox"/> | <input type="checkbox"/> | <input type="checkbox"/> | <input type="checkbox"/> | 19 |
| • Jeg har lært mye om hvor flotte mennesker kan være .....                           | <input type="checkbox"/> | <input type="checkbox"/> | <input type="checkbox"/> | <input type="checkbox"/> | <input type="checkbox"/> | <input type="checkbox"/> | 20 |
| • Jeg aksepterer i større grad at jeg trenger andre .....                            | <input type="checkbox"/> | <input type="checkbox"/> | <input type="checkbox"/> | <input type="checkbox"/> | <input type="checkbox"/> | <input type="checkbox"/> | 21 |

## Demografi:

Nedenfor følger noen spørsmål om bosted, familieforhold, inntekt og lignende.

**Q65** Er foreldrene dine skilt/separerte?

Ja .....  1  
Nei .....  2

**Q66** Bor du sammen med noen?

Nei .....  1  
Ja .....  2

**Q67** Hvis ja, hvem?

Ett svar for hver linje

|                                          | Ja<br>1                  | Nei<br>2                 |
|------------------------------------------|--------------------------|--------------------------|
| Ektefelle/samboer .....                  | <input type="checkbox"/> | <input type="checkbox"/> |
| En eller begge foreldre .....            | <input type="checkbox"/> | <input type="checkbox"/> |
| Andre voksne .....                       | <input type="checkbox"/> | <input type="checkbox"/> |
| Ett eller flere barn (under 18 år) ..... | <input type="checkbox"/> | <input type="checkbox"/> |

**Q68** Har du flyttet til annen kommune etter 22. juli 2011?

Ja .....  1  
Nei .....  2

**Q69** Er du i arbeid (hel- eller deltid, minst 50%)?

Ja .....  1  
Nei .....  2

**Q70** Er du student eller skoleelev (hel- eller deltid, minst 50%)?

Ja .....  1  
Nei .....  2

HVIS JA PÅ SPM. **Q69**

**Q71** Har du vært borte fra jobb på grunn av fysiske eller psykiske plager i løpet av de siste 3 månedene?

Nei .....  1  
Ja .....  2

HVIS JA PÅ SPM. **Q70**

**Q72** Har du vært borte fra skole på grunn av fysiske eller psykiske plager i løpet av de siste 3 månedene?

Nei .....  1  
Ja .....  2

HVIS JA PÅ SPM. **Q71** ELLER **Q72**

**Q73** Omtrent hvor mange dager med sykefravær har du hatt til sammen de siste 3 månedene?

5 dager eller mindre .....  1  
6-10 dager .....  2  
11-20 dager .....  3  
Mer enn 20 dager .....  4

**Q74** Var du med på forrige intervjurunde i studien?

Ja ..... ( ⇒ Q91 )  1  
Nei .....  2

TIL DEG SOM IKKE VAR MED PÅ FORRIGE INTERVJURUNDE

**Q75** Kjønn

1 Kvinne/jente .....  1  
2 Mann/gutt .....  2  
3  
4

**Q76** Antall søsken (inklusive halvsøsken og stesøsken)

Noter antall

**Q77** Antall foreldre som er i live (biologiske og adoptivforeldre)

0 .....  0  
1 .....  1  
2 .....  2

**Q78** Er du født i Norge?

Ja .....  1  
Nei .....  2

HVIS FØDT I ANNET LAND

**Q79** Hvilket land ble du født i?

Noter \_\_\_\_\_

**Q80** Er moren din født i Norge?

Ja .....  1  
Nei .....  2

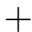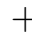

| HVIS MOREN DIN BLE FØDT I ANNET LAND |                                     |
|--------------------------------------|-------------------------------------|
| <b>Q81</b>                           | <b>Hvilket land ble hun født i?</b> |
| Noter _____                          |                                     |
| <b>Q82</b>                           | <b>Er faren din født i Norge?</b>   |
| Ja .....                             | <input type="checkbox"/> 1          |
| Nei .....                            | <input type="checkbox"/> 2          |

| HVIS FAREN DIN BLE FØDT I ANNET LAND                                                   |                                                          |
|----------------------------------------------------------------------------------------|----------------------------------------------------------|
| <b>Q83</b>                                                                             | <b>Hvilket land ble han født i?</b>                      |
| Noter _____                                                                            |                                                          |
| <b>Q84</b>                                                                             | <b>Hva er din høyeste fullførte utdanning/skolegang?</b> |
| Universitet/høyskole mer enn 4 år .....                                                | <input type="checkbox"/> 1                               |
| Universitet /høyskole inntil 4 år .....                                                | <input type="checkbox"/> 2                               |
| Studieforberedende opplæring / allmennfaglig studieretning på videregående skole ..... | <input type="checkbox"/> 3                               |
| Yrkesfaglig opplæring / yrkesfaglig studieretning på videregående skole .....          | <input type="checkbox"/> 4                               |
| Grunnskole .....                                                                       | <input type="checkbox"/> 5                               |
| Ingen fullført utdanning .....                                                         | <input type="checkbox"/> 6                               |

| TIL DEM SOM BOR MED FORELDRE      |                                                                            |
|-----------------------------------|----------------------------------------------------------------------------|
| <b>Q85</b>                        | <b>Hvor god råd synes du at familien din har i forhold til folk flest?</b> |
| Mye bedre råd .....               | <input type="checkbox"/> 1                                                 |
| Noe bedre råd .....               | <input type="checkbox"/> 2                                                 |
| Omtrent som folk flest .....      | <input type="checkbox"/> 3                                                 |
| Noe dårligere råd .....           | <input type="checkbox"/> 4                                                 |
| Mye dårligere råd .....           | <input type="checkbox"/> 5                                                 |
| TIL DEM SOM IKKE BOR MED FORELDRE |                                                                            |
| <b>Q86</b>                        | <b>Hvor god råd synes du at du har i forhold til folk flest?</b>           |
| Mye bedre råd .....               | <input type="checkbox"/> 1                                                 |
| Noe bedre råd .....               | <input type="checkbox"/> 2                                                 |
| Omtrent som folk flest .....      | <input type="checkbox"/> 3                                                 |
| Noe dårligere råd .....           | <input type="checkbox"/> 4                                                 |
| Mye dårligere råd .....           | <input type="checkbox"/> 5                                                 |
| <b>Q87</b>                        | <b>Var du medlem i AUF 22. juli 2011?</b>                                  |
| Ja .....                          | <input type="checkbox"/> 1                                                 |
| Nei .....                         | <input type="checkbox"/> 2                                                 |
| <b>Q88</b>                        | <b>Er du medlem i statskirken eller annet kristent trossamfunn?</b>        |
| Ja .....                          | <input type="checkbox"/> 1                                                 |
| Nei .....                         | <input type="checkbox"/> 2                                                 |
| <b>Q89</b>                        | <b>Er du medlem av islamsk trossamfunn?</b>                                |
| Ja .....                          | <input type="checkbox"/> 1                                                 |
| Nei .....                         | <input type="checkbox"/> 2                                                 |
| <b>Q90</b>                        | <b>Er du medlem av noen andre trossamfunn?</b>                             |
| Ja .....                          | <input type="checkbox"/> 1                                                 |
| Nei .....                         | <input type="checkbox"/> 2                                                 |

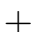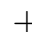



## Hjelpetiltak

Q91

|                                                                                                                 | Q91.A                                                                              |                               | Q91.B                          |                               |                               |                               | Q91.C                                                             |                               |                               |   |
|-----------------------------------------------------------------------------------------------------------------|------------------------------------------------------------------------------------|-------------------------------|--------------------------------|-------------------------------|-------------------------------|-------------------------------|-------------------------------------------------------------------|-------------------------------|-------------------------------|---|
|                                                                                                                 | Har du hatt kontakt med noen av følgende personer/instanser inneværende år (2012)? |                               | Hvis ja, ca hvor mange ganger? |                               |                               |                               | Hvis ja, i hvilken grad har denne hjelpen vært til nytte for deg? |                               |                               |   |
|                                                                                                                 | Ja                                                                                 | Nei                           | Ingen timer                    | 1-3 timer                     | 4-10 timer                    | 11 timer eller flere          | Ikke i det hele tatt                                              | I noen grad                   | I stor grad                   |   |
| • Kontaktpersonen du fikk oppnevnt rett etter hendelsen .....                                                   | 1<br><input type="checkbox"/>                                                      | 2<br><input type="checkbox"/> | 1<br><input type="checkbox"/>  | 2<br><input type="checkbox"/> | 3<br><input type="checkbox"/> | 4<br><input type="checkbox"/> | 1<br><input type="checkbox"/>                                     | 2<br><input type="checkbox"/> | 3<br><input type="checkbox"/> | 1 |
| • Fastlegen din .....                                                                                           | <input type="checkbox"/>                                                           | <input type="checkbox"/>      | <input type="checkbox"/>       | <input type="checkbox"/>      | <input type="checkbox"/>      | <input type="checkbox"/>      | <input type="checkbox"/>                                          | <input type="checkbox"/>      | <input type="checkbox"/>      | 2 |
| • Andre hjelpepersoner i kommunen (både i helsetjenesten, psykisk helsevern eller andre kommunale tjenester) .. | <input type="checkbox"/>                                                           | <input type="checkbox"/>      | <input type="checkbox"/>       | <input type="checkbox"/>      | <input type="checkbox"/>      | <input type="checkbox"/>      | <input type="checkbox"/>                                          | <input type="checkbox"/>      | <input type="checkbox"/>      | 3 |
| • Spesialister (som psykologer/psykiatere på sykehus, poliklinikk, privat el.l) .....                           | <input type="checkbox"/>                                                           | <input type="checkbox"/>      | <input type="checkbox"/>       | <input type="checkbox"/>      | <input type="checkbox"/>      | <input type="checkbox"/>      | <input type="checkbox"/>                                          | <input type="checkbox"/>      | <input type="checkbox"/>      | 4 |
| • Sjelesørger (prest, imam) .....                                                                               | <input type="checkbox"/>                                                           | <input type="checkbox"/>      | <input type="checkbox"/>       | <input type="checkbox"/>      | <input type="checkbox"/>      | <input type="checkbox"/>      | <input type="checkbox"/>                                          | <input type="checkbox"/>      | <input type="checkbox"/>      | 5 |

## Psykisk helse før terroren

Q92 Har du noen gang, før 22. juli 2011...

|                                                                                                            | Ja                            | Nei                           |   |
|------------------------------------------------------------------------------------------------------------|-------------------------------|-------------------------------|---|
| • Fått hjelp fra psykisk helsevesen (for eksempel BUP, DPS, privatpraktiserende psykolog/psykiater)? ..... | 1<br><input type="checkbox"/> | 2<br><input type="checkbox"/> | 1 |
| • Fått hjelp fra andre instanser (for eksempel PPT, familievernkontor, barneverntjenesten)? ...            | <input type="checkbox"/>      | <input type="checkbox"/>      | 2 |
| • Fått medikamenter mot depresjon, angst eller andre psykiske problemer? .....                             | <input type="checkbox"/>      | <input type="checkbox"/>      | 3 |
| • Kjent deg plaget av å være nedstemt, deprimert eller følelse av håpløshet i fire uker eller mer? .....   | <input type="checkbox"/>      | <input type="checkbox"/>      | 4 |
| • Vært plaget av panikkfølelser eller vedvarende uro eller angst i fire uker eller mer? .....              | <input type="checkbox"/>      | <input type="checkbox"/>      | 5 |

**Når du har fylt inn spørsmålene ovenfor, vil intervjuer avslutte med å diskutere hjelpebehov med deg.**

## Del IV Vurdering av udekket hjelpebehov

### Udekket hjelpebehov

#### Spørsmålene nedenfor fylles ut av intervjuer i samråd med deg

| Q93 | Instruksjon til intervjuer:<br>Hvis informanten svarte litt eller mer plaget på spørsmål om «Tanker om å ta ditt liv» (på Q6) foretas en suicidalitetsvurdering hvor blant annet følgende momenter bør dekkes: | Ja                       | Nei                      |   |
|-----|----------------------------------------------------------------------------------------------------------------------------------------------------------------------------------------------------------------|--------------------------|--------------------------|---|
|     |                                                                                                                                                                                                                | 1                        | 2                        |   |
|     | Har du noen gang skadet deg selv? .....                                                                                                                                                                        | <input type="checkbox"/> | <input type="checkbox"/> | 1 |
|     | Har du skadet deg selv i løpet av de siste 14 dagene? .....                                                                                                                                                    | <input type="checkbox"/> | <input type="checkbox"/> | 2 |
|     | Har du konkrete tanker om å ta ditt eget liv? .....                                                                                                                                                            | <input type="checkbox"/> | <input type="checkbox"/> | 3 |
|     | Har du planer om å ta ditt eget liv? .....                                                                                                                                                                     | <input type="checkbox"/> | <input type="checkbox"/> | 4 |

FOR ALLE

| Q94       | Får du dekket de behovene du mener du har for hjelp nå (for eksempel fra psykolog, lege, sykepleier, sosial arbeider, eller andre profesjonelle)? |                            |
|-----------|---------------------------------------------------------------------------------------------------------------------------------------------------|----------------------------|
| Ja .....  |                                                                                                                                                   | <input type="checkbox"/> 1 |
| Nei ..... |                                                                                                                                                   | <input type="checkbox"/> 2 |

**Instruksjon til intervjuer:**  
På bakgrunn av svar på spørsmål **Q93** og **Q94** skal det foretas en klinisk vurdering av hjelpebehov. Hvis det er udekket hjelpebehov skal intervjuer følge opp dette. Oppfølgingen kan være formidling av kontakt med hjelpeapparatet eller informasjon om hvordan få nødvendig hjelp. Ved behov kan det tilbys telefonisk oppfølging fra deg for å høre om personen har fått kontakt med hjelpeinstans.

| Q95       | Er det i orden at vi kontakter deg igjen om 1,5 år for et nytt intervju? |                            |
|-----------|--------------------------------------------------------------------------|----------------------------|
| Ja .....  |                                                                          | <input type="checkbox"/> 1 |
| Nei ..... |                                                                          | <input type="checkbox"/> 2 |

### Avslutning av intervjuet

**Instruksjon til intervjuer:**  
Gi deltakeren god tid til å avslutte intervjuet eller kommentere. Kanskje er det ting de ønsker du skulle ha spurt om eller annet de ønsker å formidle tilbake til oss. Dersom deltakeren trenger tid til å avslutte, vis respekt for det. Hjelp til med eventuelle emosjonelle reaksjoner som de trenger hjelp til. Husk å takke for at de har deltatt og minn dem på at all kontaktinformasjon står i informasjonsskrivet.
